# Supplementary material for: Biophysical and Biochemical Comparison of Extracellular Vesicles Produced by Infective and Non-Infective Stages of Trypanosoma cruzi
Source: MDPI journal article supplement (doi:10.3390/ijms22105183), 2021-05-13
Supplement: s1 [file s1]

Archive with 3 entries (3 files):
- ijms-1203006-supplementary.pdf
- Supplementary Table S1.xlsx
- Supplementary Table S2.xlsx
