# Supplementary material for: Biophysical and Biochemical Comparison of Extracellular Vesicles Produced by Infective and Non-Infective Stages of Trypanosoma cruzi
Source: MDPI journal article supplement (doi:10.3390/ijms22105183), 2021-05-13
Supplement: s1 [file s1 › Supplementary Table S1.xlsx]

## Sheet: EPI specific
Accession	Description	MW [kDa]	calc. pI	# Peptides Sample 1	# Peptides Sample 2	# Peptides Sample 3	# PSM Sample 1	# PSM Sample 2	# PSM Sample 3
Q4E4E7	Tyrosine aminotransferase OS=Trypanosoma cruzi (strain CL Brener) OX=353153 GN=Tc00.1047053510187.30 PE=4 SV=1 - [Q4E4E7_TRYCC]	46.1	6.21	6	13	12	11	21	22
Q4DL69	Uncharacterized protein OS=Trypanosoma cruzi (strain CL Brener) OX=353153 GN=Tc00.1047053508919.140 PE=4 SV=1 - [Q4DL69_TRYCC]	87.2	8.62		4	5		4	5
Q4E2P2	Cytochrome C oxidase subunit IV, putative OS=Trypanosoma cruzi (strain CL Brener) OX=353153 GN=Tc00.1047053510889.50 PE=4 SV=1 - [Q4E2P2_TRYCC]	38.9	6.06		2	3		2	4
Q4CMQ7	Trypanothione reductase, putative (Fragment) OS=Trypanosoma cruzi (strain CL Brener) OX=353153 GN=Tc00.1047053504507.5 PE=4 SV=1 - [Q4CMQ7_TRYCC]	42.5	6.46		3	5		5	5
Q4DU82	Transketolase OS=Trypanosoma cruzi (strain CL Brener) OX=353153 GN=Tc00.1047053511903.120 PE=3 SV=1 - [Q4DU82_TRYCC]	72.8	6.83	2	6	9	7	14	21
Q4DGT6	Uncharacterized protein OS=Trypanosoma cruzi (strain CL Brener) OX=353153 GN=Tc00.1047053507081.130 PE=4 SV=1 - [Q4DGT6_TRYCC]	29.9	6.52	4	5	4	6	8	6
Q4DHU8	Galactokinase, putative OS=Trypanosoma cruzi (strain CL Brener) OX=353153 GN=Tc00.1047053508465.90 PE=4 SV=1 - [Q4DHU8_TRYCC]	51.7	7.55		2	3		2	3
Q4D5T6	Retrotransposon hot spot (RHS) protein, putative OS=Trypanosoma cruzi (strain CL Brener) OX=353153 GN=Tc00.1047053507555.80 PE=4 SV=1 - [Q4D5T6_TRYCC]	104.5	5.76		2	4		2	4
Q4DUB8	Uncharacterized protein OS=Trypanosoma cruzi (strain CL Brener) OX=353153 GN=Tc00.1047053506625.240 PE=4 SV=1 - [Q4DUB8_TRYCC]	32.6	7.01		2	3		3	3
Q4D729	Hslvu complex proteolytic subunit-like, putative OS=Trypanosoma cruzi (strain CL Brener) OX=353153 GN=Tc00.1047053506275.20 PE=4 SV=1 - [Q4D729_TRYCC]	22.9	7.25	2	3		2	3
Q4CZ29	Thiol-dependent reductase 1, putative OS=Trypanosoma cruzi (strain CL Brener) OX=353153 GN=Tc00.1047053503419.30 PE=4 SV=1 - [Q4CZ29_TRYCC]	50.6	5.87	3	5	4	3	7	6
Q4DE37	Plasma membrane ATPase OS=Trypanosoma cruzi (strain CL Brener) OX=353153 GN=Tc00.1047053506649.20 PE=3 SV=1 - [Q4DE37_TRYCC]	99.5	6.15	3	6	6	4	8	7
Q4DZW1	Purine nucleoside phosphorylase OS=Trypanosoma cruzi (strain CL Brener) OX=353153 GN=Tc00.1047053506789.280 PE=3 SV=1 - [Q4DZW1_TRYCC]	33.2	7.36	3	7	5	8	10	7
Q4CX07	ABC transporter, putative OS=Trypanosoma cruzi (strain CL Brener) OX=353153 GN=Tc00.1047053506249.70 PE=4 SV=1 - [Q4CX07_TRYCC]	74.6	8.78	5	5	3	6	6	3
Q4CVF7	Tricarboxylate carrier, putative OS=Trypanosoma cruzi (strain CL Brener) OX=353153 GN=Tc00.1047053511583.40 PE=4 SV=1 - [Q4CVF7_TRYCC]	35.9	9.47	3		2	4		2
Q4CYC6	Uncharacterized protein OS=Trypanosoma cruzi (strain CL Brener) OX=353153 GN=Tc00.1047053510679.40 PE=4 SV=1 - [Q4CYC6_TRYCC]	52.2	8.72	2	4	7	4	5	10
Q4D610	Calpain-like cysteine peptidase, putative OS=Trypanosoma cruzi (strain CL Brener) OX=353153 GN=Tc00.1047053508555.50 PE=3 SV=1 - [Q4D610_TRYCC]	80.9	8.68	6	9	10	10	14	16
Q4DM56	Serine carboxypeptidase S28, putative OS=Trypanosoma cruzi (strain CL Brener) OX=353153 GN=Tc00.1047053506425.10 PE=4 SV=1 - [Q4DM56_TRYCC]	72.1	6.57	2		2	2		4
Q4DVF8	Uncharacterized protein OS=Trypanosoma cruzi (strain CL Brener) OX=353153 GN=Tc00.1047053506859.180 PE=4 SV=1 - [Q4DVF8_TRYCC]	42.8	5.36	3	5	4	4	7	7
Q4E3A0	Uncharacterized protein OS=Trypanosoma cruzi (strain CL Brener) OX=353153 GN=Tc00.1047053508355.290 PE=4 SV=1 - [Q4E3A0_TRYCC]	36.3	8.95	4	4	4	7	5	5
Q4CMB7	Methyltransferase OS=Trypanosoma cruzi (strain CL Brener) OX=353153 GN=Tc00.1047053504191.10 PE=3 SV=1 - [Q4CMB7_TRYCC]	40.4	6.92	4	5	5	5	6	8
Q4E0D6	Calpain cysteine peptidase, putative OS=Trypanosoma cruzi (strain CL Brener) OX=353153 GN=Tc00.1047053508999.220 PE=3 SV=1 - [Q4E0D6_TRYCC]	82.4	6.44	2		2	5		2
Q4DWG4	Uncharacterized protein OS=Trypanosoma cruzi (strain CL Brener) OX=353153 GN=Tc00.1047053511725.280 PE=4 SV=1 - [Q4DWG4_TRYCC]	48	6.23	4	6	8	4	6	12
Q4DA50	Uncharacterized protein OS=Trypanosoma cruzi (strain CL Brener) OX=353153 GN=Tc00.1047053507019.80 PE=4 SV=1 - [Q4DA50_TRYCC]	79.8	7.74	2	2	3	2	2	3
Q4DX13	Dispersed gene family protein 1 (DGF-1), putative OS=Trypanosoma cruzi (strain CL Brener) OX=353153 GN=Tc00.1047053508831.250 PE=4 SV=1 - [Q4DX13_TRYCC]	359.8	6.15	2	3	2	4	4	2
Q4E355	Uncharacterized protein OS=Trypanosoma cruzi (strain CL Brener) OX=353153 GN=Tc00.1047053508741.170 PE=4 SV=1 - [Q4E355_TRYCC]	56.1	8.15	7	10	11	9	16	22
Q4CU84	Uncharacterized protein (Fragment) OS=Trypanosoma cruzi (strain CL Brener) OX=353153 GN=Tc00.1047053507675.10 PE=4 SV=1 - [Q4CU84_TRYCC]	82	5.71	2	3	2	2	4	4
Q4E4V7	Prostaglandin F2alpha synthase OS=Trypanosoma cruzi (strain CL Brener) OX=353153 GN=Tc00.1047053508461.80 PE=4 SV=1 - [Q4E4V7_TRYCC]	42.2	6.47	10	10	11	12	12	16
Q4CN14	Uncharacterized protein OS=Trypanosoma cruzi (strain CL Brener) OX=353153 GN=Tc00.1047053509441.10 PE=4 SV=1 - [Q4CN14_TRYCC]	52.9	7.2	3		2	5		2
Q4E2Q5	Uncharacterized protein OS=Trypanosoma cruzi (strain CL Brener) OX=353153 GN=Tc00.1047053504153.280 PE=4 SV=1 - [Q4E2Q5_TRYCC]	45.9	8.46	2	5	6	2	6	6
Q4D360	Pyridoxal kinase, putative OS=Trypanosoma cruzi (strain CL Brener) OX=353153 GN=Tc00.1047053507925.40 PE=4 SV=1 - [Q4D360_TRYCC]	33.4	6.44	3	2		3	2
Q4DS02	Uncharacterized protein OS=Trypanosoma cruzi (strain CL Brener) OX=353153 GN=Tc00.1047053507949.250 PE=4 SV=1 - [Q4DS02_TRYCC]	39.2	8.15	3	4	2	6	7	3
Q4D4Y3	Uncharacterized protein OS=Trypanosoma cruzi (strain CL Brener) OX=353153 GN=Tc00.1047053509859.10 PE=4 SV=1 - [Q4D4Y3_TRYCC]	40.3	8.28	4		2	5		3
Q4CPC6	Uncharacterized protein OS=Trypanosoma cruzi (strain CL Brener) OX=353153 GN=Tc00.1047053508863.10 PE=4 SV=1 - [Q4CPC6_TRYCC]	20	7.77	2	2		4	4
Q4E658	Katanin-like protein, putative OS=Trypanosoma cruzi (strain CL Brener) OX=353153 GN=Tc00.1047053508153.330 PE=3 SV=1 - [Q4E658_TRYCC]	50	7.05	2	2	3	3	3	3
Q4DG60	Folate/pteridine transporter, putative OS=Trypanosoma cruzi (strain CL Brener) OX=353153 GN=Tc00.1047053511575.130 PE=4 SV=1 - [Q4DG60_TRYCC]	69.6	7.59	2	2	2	2	2	2
Q4CWM9	Dispersed gene family protein 1 (DGF-1), putative (Fragment) OS=Trypanosoma cruzi (strain CL Brener) OX=353153 GN=Tc00.1047053507719.9 PE=4 SV=1 - [Q4CWM9_TRYCC]	298.3	6.02	3	8	6	5	11	7
Q4DDX6	Trans-sialidase, putative (Fragment) OS=Trypanosoma cruzi (strain CL Brener) OX=353153 GN=Tc00.1047053507835.80 PE=4 SV=1 - [Q4DDX6_TRYCC]	23.3	9.61	3	4	5	10	7	6
Q4DFC2	Myo-inositol-1-phosphate synthase, putative OS=Trypanosoma cruzi (strain CL Brener) OX=353153 GN=Tc00.1047053507609.60 PE=4 SV=1 - [Q4DFC2_TRYCC]	58.3	6.67	2	9	9	2	15	11
Q4CWA4	ABC transporter, putative (Fragment) OS=Trypanosoma cruzi (strain CL Brener) OX=353153 GN=Tc00.1047053507241.39 PE=4 SV=1 - [Q4CWA4_TRYCC]	31.8	6.25	4		2	6		4
Q4DI34	Dispersed gene family protein 1 (DGF-1), putative OS=Trypanosoma cruzi (strain CL Brener) OX=353153 GN=Tc00.1047053507653.40 PE=4 SV=1 - [Q4DI34_TRYCC]	358.3	6.47	2	6	5	2	9	6
Q4DLU4	Uncharacterized protein OS=Trypanosoma cruzi (strain CL Brener) OX=353153 GN=Tc00.1047053509683.10 PE=4 SV=1 - [Q4DLU4_TRYCC]	323.8	6.06	2	6	2	3	9	3
Q4DGX6	Peptidase M20/M25/M40, putative OS=Trypanosoma cruzi (strain CL Brener) OX=353153 GN=Tc00.1047053509213.120 PE=4 SV=1 - [Q4DGX6_TRYCC]	51.2	5.58	3	9	10	4	18	18
Q4DKB5	Dispersed gene family protein 1 (DGF-1), putative OS=Trypanosoma cruzi (strain CL Brener) OX=353153 GN=Tc00.1047053508061.50 PE=4 SV=1 - [Q4DKB5_TRYCC]	359	5.94	2	4		4	7
Q4CQK8	Uncharacterized protein OS=Trypanosoma cruzi (strain CL Brener) OX=353153 GN=Tc00.1047053507659.10 PE=4 SV=1 - [Q4CQK8_TRYCC]	31.1	7.28	3	4	2	3	8	3
Q4DSL1	Translation initiation factor, putative OS=Trypanosoma cruzi (strain CL Brener) OX=353153 GN=Tc00.1047053511303.60 PE=4 SV=1 - [Q4DSL1_TRYCC]	79.8	8.59	2	9	11	2	9	14
Q4DU43	Dispersed gene family protein 1 (DGF-1), putative OS=Trypanosoma cruzi (strain CL Brener) OX=353153 GN=Tc00.1047053506241.19 PE=4 SV=1 - [Q4DU43_TRYCC]	358.1	6.47	3	7	6	5	12	7
Q4E5K0	Dispersed gene family protein 1 (DGF-1), putative OS=Trypanosoma cruzi (strain CL Brener) OX=353153 GN=Tc00.1047053511183.460 PE=4 SV=1 - [Q4E5K0_TRYCC]	362	6.01	3	6	4	5	8	5
Q4CLQ7	Uncharacterized protein (Fragment) OS=Trypanosoma cruzi (strain CL Brener) OX=353153 GN=Tc00.1047053509107.9 PE=4 SV=1 - [Q4CLQ7_TRYCC]	64.7	8.43	4	2	2	9	2	2
Q4CTN2	Dispersed gene family protein 1 (DGF-1), putative (Fragment) OS=Trypanosoma cruzi (strain CL Brener) OX=353153 GN=Tc00.1047053508845.9 PE=4 SV=1 - [Q4CTN2_TRYCC]	194.5	6.07	2	3	3	4	4	3
Q4D1B8	Tryparedoxin, putative OS=Trypanosoma cruzi (strain CL Brener) OX=353153 GN=Tc00.1047053509997.30 PE=4 SV=1 - [Q4D1B8_TRYCC]	16	5.27	3		2	3		2
Q4DFX2	Uncharacterized protein OS=Trypanosoma cruzi (strain CL Brener) OX=353153 GN=Tc00.1047053506367.30 PE=4 SV=1 - [Q4DFX2_TRYCC]	37.6	5.97	3	3	3	3	3	4
Q4DVF3	Dispersed gene family protein 1 (DGF-1), putative OS=Trypanosoma cruzi (strain CL Brener) OX=353153 GN=Tc00.1047053510465.10 PE=4 SV=1 - [Q4DVF3_TRYCC]	360.8	6.46	2	5	5	2	8	6
Q4D1L8	Uncharacterized protein OS=Trypanosoma cruzi (strain CL Brener) OX=353153 GN=Tc00.1047053504003.30 PE=4 SV=1 - [Q4D1L8_TRYCC]	69.1	6.74	3	3	4	4	3	4
Q4DKI7	Thiol-dependent reductase 1, putative OS=Trypanosoma cruzi (strain CL Brener) OX=353153 GN=Tc00.1047053509105.70 PE=4 SV=1 - [Q4DKI7_TRYCC]	50.7	5.97	2	4	3	2	7	5
Q4CXR9	Cystathionine beta-synthase OS=Trypanosoma cruzi (strain CL Brener) OX=353153 GN=Tc00.1047053506905.50 PE=4 SV=1 - [Q4CXR9_TRYCC]	42	6.79	6	11	11	18	30	27
Q4DES8	Uncharacterized protein OS=Trypanosoma cruzi (strain CL Brener) OX=353153 GN=Tc00.1047053506175.110 PE=4 SV=1 - [Q4DES8_TRYCC]	66	8.35	2	4	3	2	4	3
Q4CYE2	Uncharacterized protein OS=Trypanosoma cruzi (strain CL Brener) OX=353153 GN=Tc00.1047053503801.50 PE=4 SV=1 - [Q4CYE2_TRYCC]	30.9	5.97	2	6	7	2	7	10
Q4CQA6	Uncharacterized protein OS=Trypanosoma cruzi (strain CL Brener) OX=353153 GN=Tc00.1047053510069.20 PE=4 SV=1 - [Q4CQA6_TRYCC]	68.4	8.56	2	2		4	2
Q4DJS8	Calpain-like cysteine peptidase, putative OS=Trypanosoma cruzi (strain CL Brener) OX=353153 GN=Tc00.1047053509237.120 PE=3 SV=1 - [Q4DJS8_TRYCC]	81	8.66	10	14	15	15	21	23
Q4DW07	Uncharacterized protein OS=Trypanosoma cruzi (strain CL Brener) OX=353153 GN=Tc00.1047053507603.220 PE=4 SV=1 - [Q4DW07_TRYCC]	49.6	9.25	2	2		4	2
Q4DPB6	Uncharacterized protein (Fragment) OS=Trypanosoma cruzi (strain CL Brener) OX=353153 GN=Tc00.1047053509647.13 PE=4 SV=1 - [Q4DPB6_TRYCC]	113.3	5.6	2	2	3	2	2	3
Q4CXI6	Uncharacterized protein OS=Trypanosoma cruzi (strain CL Brener) OX=353153 GN=Tc00.1047053508821.40 PE=4 SV=1 - [Q4CXI6_TRYCC]	42.7	8.19	2	2		3	3
Q4D9T0	Thermostable carboxypeptidase 1, putative OS=Trypanosoma cruzi (strain CL Brener) OX=353153 GN=Tc00.1047053504045.60 PE=4 SV=1 - [Q4D9T0_TRYCC]	58.2	6.21	2	6	7	2	9	10
Q4DYZ9	Uncharacterized protein OS=Trypanosoma cruzi (strain CL Brener) OX=353153 GN=Tc00.1047053510303.220 PE=4 SV=1 - [Q4DYZ9_TRYCC]	42.1	6.65	5	4	4	5	4	4
Q4DP85	Uncharacterized protein OS=Trypanosoma cruzi (strain CL Brener) OX=353153 GN=Tc00.1047053506127.150 PE=4 SV=1 - [Q4DP85_TRYCC]	96.3	6.48	2		3	2		3
Q4CW64	Calpain-like cysteine peptidase, putative OS=Trypanosoma cruzi (strain CL Brener) OX=353153 GN=Tc00.1047053509003.30 PE=4 SV=1 - [Q4CW64_TRYCC]	14.9	6.92	3	4	2	4	6	3
Q4DWA3	ABC transporter, putative OS=Trypanosoma cruzi (strain CL Brener) OX=353153 GN=Tc00.1047053506989.30 PE=4 SV=1 - [Q4DWA3_TRYCC]	206.7	8.38	23	11	9	41	13	10
Q4DCV6	Uncharacterized protein OS=Trypanosoma cruzi (strain CL Brener) OX=353153 GN=Tc00.1047053506407.70 PE=4 SV=1 - [Q4DCV6_TRYCC]	29.6	9.32		2	3		3	3
Q4CVA3	Thimet oligopeptidase, putative OS=Trypanosoma cruzi (strain CL Brener) OX=353153 GN=Tc00.1047053506411.10 PE=3 SV=1 - [Q4CVA3_TRYCC]	77.5	5.96		2	2		2	2
Q4DQE0	Uncharacterized protein OS=Trypanosoma cruzi (strain CL Brener) OX=353153 GN=Tc00.1047053506629.40 PE=4 SV=1 - [Q4DQE0_TRYCC]	57.7	4.26		2	2		2	3
Q4DUX0	Uncharacterized protein OS=Trypanosoma cruzi (strain CL Brener) OX=353153 GN=Tc00.1047053506605.120 PE=4 SV=1 - [Q4DUX0_TRYCC]	22.3	4.74		2	2		2	2
Q4DZP2	60S ribosomal protein L18 OS=Trypanosoma cruzi (strain CL Brener) OX=353153 GN=RPL18 PE=1 SV=1 - [RL18_TRYCC]	21.7	11.66		2	2		3	4
Q4DFP0	NADP-dependent alcohol hydrogenase, putative OS=Trypanosoma cruzi (strain CL Brener) OX=353153 GN=Tc00.1047053504425.60 PE=3 SV=1 - [Q4DFP0_TRYCC]	37.3	7.49		3	7		4	8
Q4D8E8	Uncharacterized protein OS=Trypanosoma cruzi (strain CL Brener) OX=353153 GN=Tc00.1047053511761.60 PE=4 SV=1 - [Q4D8E8_TRYCC]	27.5	7.66		2	2		2	3
Q4DJA1	Uncharacterized protein OS=Trypanosoma cruzi (strain CL Brener) OX=353153 GN=Tc00.1047053511815.40 PE=4 SV=1 - [Q4DJA1_TRYCC]	52.5	8.21		2	2		2	3
Q4CMT5	Uncharacterized protein OS=Trypanosoma cruzi (strain CL Brener) OX=353153 GN=Tc00.1047053509497.20 PE=4 SV=1 - [Q4CMT5_TRYCC]	48.7	5.4		3	3		3	3
Q4DY24	Elongation factor TU, putative OS=Trypanosoma cruzi (strain CL Brener) OX=353153 GN=Tc00.1047053506357.40 PE=4 SV=1 - [Q4DY24_TRYCC]	51.7	7.52		4	4		6	5
Q4DCQ3	Superoxide dismutase OS=Trypanosoma cruzi (strain CL Brener) OX=353153 GN=Tc00.1047053509775.40 PE=1 SV=1 - [Q4DCQ3_TRYCC]	26.1	8.6		2	2		2	2
Q4E0D8	Calpain-like cysteine peptidase, putative OS=Trypanosoma cruzi (strain CL Brener) OX=353153 GN=Tc00.1047053508999.190 PE=3 SV=1 - [Q4E0D8_TRYCC]	95.7	5.05		3	2		4	2
Q4CU30	Nucleolar protein, putative (Fragment) OS=Trypanosoma cruzi (strain CL Brener) OX=353153 GN=Tc00.1047053511573.58 PE=4 SV=1 - [Q4CU30_TRYCC]	42.9	8.25		3	4		4	5
Q4CUG4	Uncharacterized protein OS=Trypanosoma cruzi (strain CL Brener) OX=353153 GN=Tc00.1047053508689.20 PE=4 SV=1 - [Q4CUG4_TRYCC]	31.6	5.39		4	5		7	8
Q4E4N4	Eukaryotic translation initiation factor 5A OS=Trypanosoma cruzi (strain CL Brener) OX=353153 GN=Tc00.1047053506925.120 PE=3 SV=1 - [Q4E4N4_TRYCC]	18	5		4	4		6	6
Q4DU88	Uncharacterized protein OS=Trypanosoma cruzi (strain CL Brener) OX=353153 GN=Tc00.1047053511903.40 PE=4 SV=1 - [Q4DU88_TRYCC]	54.7	6.61		7	6		9	8
Q4CY21	Eukaryotic translation initiation factor 3 (EIF-3) interacting protein, putative OS=Trypanosoma cruzi (strain CL Brener) OX=353153 GN=Tc00.1047053506581.30 PE=4 SV=1 - [Q4CY21_TRYCC]	56.2	8.51		4	5		5	6
Q7Z1V1	Sterol 14-alpha demethylase OS=Trypanosoma cruzi (strain CL Brener) OX=353153 GN=CYP51 PE=1 SV=1 - [CP51_TRYCC]	54.6	7.69		2	2		2	2
Q868H8	Proline racemase B OS=Trypanosoma cruzi (strain CL Brener) OX=353153 GN=PA45-B PE=1 SV=1 - [PRCMB_TRYCC]	38.4	5.67		5	5		7	7
Q4CVT7	Imidazolonepropionase, putative OS=Trypanosoma cruzi (strain CL Brener) OX=353153 GN=Tc00.1047053508741.140 PE=4 SV=1 - [Q4CVT7_TRYCC]	46.7	6.14		3	3		3	3
Q4E133	Histidine ammonia-lyase OS=Trypanosoma cruzi (strain CL Brener) OX=353153 GN=Tc00.1047053506247.220 PE=3 SV=1 - [Q4E133_TRYCC]	58	7.91		13	15		30	27
Q4DE50	Eukaryotic translation initiation factor 3 subunit E OS=Trypanosoma cruzi (strain CL Brener) OX=353153 GN=Tc00.1047053508699.40 PE=3 SV=1 - [Q4DE50_TRYCC]	46.2	5.9		9	9		14	12
Q4DFX9	Aminopeptidase P, putative OS=Trypanosoma cruzi (strain CL Brener) OX=353153 GN=Tc00.1047053510655.120 PE=3 SV=1 - [Q4DFX9_TRYCC]	56.8	6.39		2	4		2	4
Q4DEJ5	Glutathione peroxidase OS=Trypanosoma cruzi (strain CL Brener) OX=353153 GN=Tc00.1047053503899.119 PE=3 SV=1 - [Q4DEJ5_TRYCC]	19.7	8.94		2	2		2	2
Q4DPI6	Peptidase T, putative OS=Trypanosoma cruzi (strain CL Brener) OX=353153 GN=Tc00.1047053506513.110 PE=4 SV=1 - [Q4DPI6_TRYCC]	46.4	5.33		3	3		7	6
Q4D795	Protein phosphatase 2C, putative OS=Trypanosoma cruzi (strain CL Brener) OX=353153 GN=Tc00.1047053506315.100 PE=4 SV=1 - [Q4D795_TRYCC]	45.7	6.05		2	2		3	3
Q4DFE2	2-hydroxy-3-oxopropionate reductase, putative OS=Trypanosoma cruzi (strain CL Brener) OX=353153 GN=Tc00.1047053507017.40 PE=4 SV=1 - [Q4DFE2_TRYCC]	31.8	6.71		3	3		3	3
Q4DDT6	Serine/threonine protein kinase, putative OS=Trypanosoma cruzi (strain CL Brener) OX=353153 GN=Tc00.1047053509607.70 PE=3 SV=1 - [Q4DDT6_TRYCC]	33.9	6.96		3	3		4	4
Q4D015	Uncharacterized protein OS=Trypanosoma cruzi (strain CL Brener) OX=353153 GN=Tc00.1047053511803.40 PE=4 SV=1 - [Q4D015_TRYCC]	70	5.73		2	2		2	2
Q4DM85	Peptidylprolyl isomerase OS=Trypanosoma cruzi (strain CL Brener) OX=353153 GN=Tc00.1047053511301.70 PE=4 SV=1 - [Q4DM85_TRYCC]	48.3	6.48		2	2		3	3
Q4DFG4	Vacuolar protein sorting-associated protein 28 homolog OS=Trypanosoma cruzi (strain CL Brener) OX=353153 GN=Tc00.1047053506155.50 PE=3 SV=1 - [Q4DFG4_TRYCC]	24.6	5.34		2	2		2	3
Q4D5X8	Nucleosome assembly protein, putative OS=Trypanosoma cruzi (strain CL Brener) OX=353153 GN=Tc00.1047053507963.79 PE=3 SV=1 - [Q4D5X8_TRYCC]	41	4.68		2	2		2	2
Q4CMU6	Cysteine peptidase, putative OS=Trypanosoma cruzi (strain CL Brener) OX=353153 GN=Tc00.1047053509401.30 PE=3 SV=1 - [Q4CMU6_TRYCC]	49.9	7.25		3	3		3	3
Q4DAD9	Nucleoside phosphorylase, putative (Fragment) OS=Trypanosoma cruzi (strain CL Brener) OX=353153 GN=Tc00.1047053508989.9 PE=4 SV=1 - [Q4DAD9_TRYCC]	28.9	8.02		4	3		4	3
Q4DPN1	Dispersed gene family protein 1 (DGF-1), putative OS=Trypanosoma cruzi (strain CL Brener) OX=353153 GN=Tc00.1047053507083.20 PE=4 SV=1 - [Q4DPN1_TRYCC]	354.1	7.36		29	30		36	37
Q4CR84	Uncharacterized protein (Fragment) OS=Trypanosoma cruzi (strain CL Brener) OX=353153 GN=Tc00.1047053507967.30 PE=4 SV=1 - [Q4CR84_TRYCC]	19.8	5.1		4	4		5	5
Q4D9I0	Phosphoribosylpyrophosphate synthetase, putative OS=Trypanosoma cruzi (strain CL Brener) OX=353153 GN=Tc00.1047053508717.30 PE=4 SV=1 - [Q4D9I0_TRYCC]	42.3	7.08		4	3		5	3
Q4D6V2	Ribonucleoside-diphosphate reductase small chain, putative OS=Trypanosoma cruzi (strain CL Brener) OX=353153 GN=Tc00.1047053506621.30 PE=4 SV=1 - [Q4D6V2_TRYCC]	39	5.07		5	5		6	7
Q4D286	Dispersed gene family protein 1 (DGF-1), putative OS=Trypanosoma cruzi (strain CL Brener) OX=353153 GN=Tc00.1047053511677.10 PE=4 SV=1 - [Q4D286_TRYCC]	359.2	6.19		4	4		6	5
Q4E4E4	Tyrosine aminotransferase, putative OS=Trypanosoma cruzi (strain CL Brener) OX=353153 GN=Tc00.1047053510187.70 PE=4 SV=1 - [Q4E4E4_TRYCC]	45.6	5.67		3	2		3	2
Q4E0T1	p22 protein, putative OS=Trypanosoma cruzi (strain CL Brener) OX=353153 GN=Tc00.1047053509965.290 PE=4 SV=1 - [Q4E0T1_TRYCC]	25.8	4.94		4	3		4	3
Q4DBP7	Dipeptidyl-peptidase, putative (Fragment) OS=Trypanosoma cruzi (strain CL Brener) OX=353153 GN=Tc00.1047053508601.141 PE=4 SV=1 - [Q4DBP7_TRYCC]	74.4	5.85		4	7		7	10
Q4DG86	25 kDa translation elongation factor 1-beta, putative OS=Trypanosoma cruzi (strain CL Brener) OX=353153 GN=Tc00.1047053506201.39 PE=3 SV=1 - [Q4DG86_TRYCC]	24.4	5.47		2	2		3	2
Q4E589	Uncharacterized protein OS=Trypanosoma cruzi (strain CL Brener) OX=353153 GN=Tc00.1047053506559.410 PE=4 SV=1 - [Q4E589_TRYCC]	42.1	6.2		4	4		5	5
Q4DH60	Pyrroline-5-carboxylate reductase OS=Trypanosoma cruzi (strain CL Brener) OX=353153 GN=Tc00.1047053509207.90 PE=3 SV=1 - [Q4DH60_TRYCC]	28.6	7.59		3	3		5	8
Q4CZ77	Dispersed gene family protein 1 (DGF-1), putative OS=Trypanosoma cruzi (strain CL Brener) OX=353153 GN=Tc00.1047053506415.10 PE=4 SV=1 - [Q4CZ77_TRYCC]	354.4	7.34		35	34		46	43
Q4DQN5	Calpain-like cysteine peptidase, putative OS=Trypanosoma cruzi (strain CL Brener) OX=353153 GN=Tc00.1047053506563.210 PE=3 SV=1 - [Q4DQN5_TRYCC]	78.2	4.97		2	2		2	2
Q4DCI5	Prohibitin, putative OS=Trypanosoma cruzi (strain CL Brener) OX=353153 GN=Tc00.1047053511469.70 PE=4 SV=1 - [Q4DCI5_TRYCC]	33	9.13		2	2		2	2
Q4DT61	RNA-binding protein, putative OS=Trypanosoma cruzi (strain CL Brener) OX=353153 GN=Tc00.1047053511621.50 PE=4 SV=1 - [Q4DT61_TRYCC]	48.7	8.98		2	2		2	2
Q4CQG0	40S ribosomal protein S12 OS=Trypanosoma cruzi (strain CL Brener) OX=353153 GN=Tc00.1047053508551.20 PE=3 SV=1 - [Q4CQG0_TRYCC]	15.9	5.14		2	3		3	5
Q4CPW5	Glutamamyl carboxypeptidase, putative OS=Trypanosoma cruzi (strain CL Brener) OX=353153 GN=Tc00.1047053507657.20 PE=4 SV=1 - [Q4CPW5_TRYCC]	43.6	6.7		14	14		23	28
Q4D452	Eukaryotic translation initiation factor 3 subunit I OS=Trypanosoma cruzi (strain CL Brener) OX=353153 GN=Tc00.1047053511229.80 PE=3 SV=1 - [Q4D452_TRYCC]	37.6	6.05		3	7		5	8
Q4DGG5	Vacuolar-type proton translocating pyrophosphatase 1, putative OS=Trypanosoma cruzi (strain CL Brener) OX=353153 GN=Tc00.1047053510773.20 PE=3 SV=1 - [Q4DGG5_TRYCC]	85.3	5.07		3	5		3	5
Q4DZB0	Eukaryotic translation initiation factor 5, putative OS=Trypanosoma cruzi (strain CL Brener) OX=353153 GN=Tc00.1047053504105.20 PE=4 SV=1 - [Q4DZB0_TRYCC]	42.8	8.13		3	2		4	3
Q4CW39	Trans-sialidase, putative (Fragment) OS=Trypanosoma cruzi (strain CL Brener) OX=353153 GN=Tc00.1047053503667.10 PE=4 SV=1 - [Q4CW39_TRYCC]	68.5	5.24		2	3		3	4
Q4DG20	Cystathionine beta-synthase, putative (Fragment) OS=Trypanosoma cruzi (strain CL Brener) OX=353153 GN=Tc00.1047053508241.149 PE=4 SV=1 - [Q4DG20_TRYCC]	10.6	8.38		3	2		5	5
Q4D0C9	Uncharacterized protein OS=Trypanosoma cruzi (strain CL Brener) OX=353153 GN=Tc00.1047053506893.100 PE=4 SV=1 - [Q4D0C9_TRYCC]	29.4	6.79		2	2		2	3
Q4E1N4	U-rich RNA-binding protein UBP-2 OS=Trypanosoma cruzi (strain CL Brener) OX=353153 GN=Tc00.1047053507093.229 PE=4 SV=1 - [Q4E1N4_TRYCC]	18.5	9.66		2	2		2	2
Q4DY23	Alcohol dehydrogenase, putative OS=Trypanosoma cruzi (strain CL Brener) OX=353153 GN=Tc00.1047053506357.50 PE=4 SV=1 - [Q4DY23_TRYCC]	41.8	6.52		3	4		5	7
Q4E501	Uncharacterized protein OS=Trypanosoma cruzi (strain CL Brener) OX=353153 GN=Tc00.1047053508873.420 PE=4 SV=1 - [Q4E501_TRYCC]	65	5.53		2	3		2	3
Q4DFU7	Uncharacterized protein OS=Trypanosoma cruzi (strain CL Brener) OX=353153 GN=Tc00.1047053507765.50 PE=4 SV=1 - [Q4DFU7_TRYCC]	20.2	4.74		2	2		2	2
Q4DWS5	Hsc70-interacting protein, putative OS=Trypanosoma cruzi (strain CL Brener) OX=353153 GN=Tc00.1047053508409.210 PE=4 SV=1 - [Q4DWS5_TRYCC]	41.6	5.01		4	3		5	4
Q4DA32	Uncharacterized protein OS=Trypanosoma cruzi (strain CL Brener) OX=353153 GN=Tc00.1047053503733.80 PE=4 SV=1 - [Q4DA32_TRYCC]	237.1	5.22		3	3		5	4
Q4DXR1	Uncharacterized protein OS=Trypanosoma cruzi (strain CL Brener) OX=353153 GN=Tc00.1047053510421.210 PE=4 SV=1 - [Q4DXR1_TRYCC]	38.6	8.78		4	7		5	8
Q4DUG3	Trans-sialidase, putative OS=Trypanosoma cruzi (strain CL Brener) OX=353153 GN=Tc00.1047053508837.70 PE=4 SV=1 - [Q4DUG3_TRYCC]	80	9.39		3	2		6	3
Q4D3W3	Aspartate carbamoyltransferase, putative OS=Trypanosoma cruzi (strain CL Brener) OX=353153 GN=Tc00.1047053508375.30 PE=1 SV=1 - [Q4D3W3_TRYCC]	35.9	6.87		4	3		4	4
Q4DQZ2	Uncharacterized protein OS=Trypanosoma cruzi (strain CL Brener) OX=353153 GN=Tc00.1047053510089.200 PE=4 SV=1 - [Q4DQZ2_TRYCC]	38.5	8.68		4	7		5	7
Q4CR09	Glutamamyl carboxypeptidase, putative OS=Trypanosoma cruzi (strain CL Brener) OX=353153 GN=Tc00.1047053510837.20 PE=4 SV=1 - [Q4CR09_TRYCC]	43.5	6.42		13	14		20	29
Q4CP72	Uncharacterized protein (Fragment) OS=Trypanosoma cruzi (strain CL Brener) OX=353153 GN=Tc00.1047053511363.4 PE=4 SV=1 - [Q4CP72_TRYCC]	28.5	4.7		3	3		4	4
Q4CTG8	60S ribosomal protein l36, putative OS=Trypanosoma cruzi (strain CL Brener) OX=353153 GN=Tc00.1047053510767.20 PE=4 SV=1 - [Q4CTG8_TRYCC]	13	11.5		2	2		2	2
Q4D9X5	H/ACA ribonucleoprotein complex subunit OS=Trypanosoma cruzi (strain CL Brener) OX=353153 GN=Tc00.1047053510687.120 PE=3 SV=1 - [Q4D9X5_TRYCC]	23.3	11.41		2	2		3	2
Q4E4E9	Tyrosine aminotransferase, putative OS=Trypanosoma cruzi (strain CL Brener) OX=353153 GN=Tc00.1047053510187.20 PE=4 SV=1 - [Q4E4E9_TRYCC]	46.1	7.18		3	2		3	2
Q4CU94	Mannose-1-phosphate guanyltransferase, putative OS=Trypanosoma cruzi (strain CL Brener) OX=353153 GN=Tc00.1047053510947.10 PE=4 SV=1 - [Q4CU94_TRYCC]	42	7.36		2	2		2	3

## Sheet: Trypo especific
Accession	Description	MW [kDa]	calc. pI	# Peptides Sample 1	# Peptides Sample 2	# Peptides Sample 3	# Peptides Sample 4	# PSM Sample 1	# PSM Sample 2	# PSM Sample 3	# PSM Sample 4
Q4CX46	Dynein heavy chain, putative (Fragment) OS=Trypanosoma cruzi (strain CL Brener) OX=353153 GN=Tc00.1047053509585.10 PE=4 SV=1 - [Q4CX46_TRYCC]	423.7	5.55	54	64	8	12	64	86	9	13
Q4D5X2	Clathrin heavy chain OS=Trypanosoma cruzi (strain CL Brener) OX=353153 GN=Tc00.1047053506167.50 PE=3 SV=1 - [Q4D5X2_TRYCC]	192.8	6.1	23	16	15	17	31	22	18	22
Q4DWP4	Uncharacterized protein OS=Trypanosoma cruzi (strain CL Brener) OX=353153 GN=Tc00.1047053511421.200 PE=4 SV=1 - [Q4DWP4_TRYCC]	122.5	8.09	13	18	14	17	18	23	19	18
Q4CQR0	Phosphodiesterase OS=Trypanosoma cruzi (strain CL Brener) OX=353153 GN=Tc00.1047053509943.20 PE=3 SV=1 - [Q4CQR0_TRYCC]	103.6	5.73	11	4	8	6	16	10	13	12
Q4DQP3	Coatomer subunit beta OS=Trypanosoma cruzi (strain CL Brener) OX=353153 GN=Tc00.1047053506563.30 PE=4 SV=1 - [Q4DQP3_TRYCC]	107.8	5.19	11	4	6	7	13	7	7	7
Q4E0Y6	Phosphodiesterase OS=Trypanosoma cruzi (strain CL Brener) OX=353153 GN=Tc00.1047053508277.100 PE=3 SV=1 - [Q4E0Y6_TRYCC]	102.4	5.69	10	5	8	8	15	8	12	15
Q4CYI3	2-oxoglutarate dehydrogenase subunit, putative OS=Trypanosoma cruzi (strain CL Brener) OX=353153 GN=Tc00.1047053510797.10 PE=4 SV=1 - [Q4CYI3_TRYCC]	113.6	6.39	9	4	18	19	9	5	23	28
Q4CQW5	Fumarate hydratase, putative OS=Trypanosoma cruzi (strain CL Brener) OX=353153 GN=Tc00.1047053509879.40 PE=4 SV=1 - [Q4CQW5_TRYCC]	60.8	8.1	9	2	3	5	10	3	5	7
Q4D6H3	Uncharacterized protein OS=Trypanosoma cruzi (strain CL Brener) OX=353153 GN=Tc00.1047053509247.30 PE=4 SV=1 - [Q4D6H3_TRYCC]	263	7.85	9	5	6	9	13	7	8	10
Q4DF48	Uncharacterized protein OS=Trypanosoma cruzi (strain CL Brener) OX=353153 GN=Tc00.1047053508177.10 PE=4 SV=1 - [Q4DF48_TRYCC]	67.8	6.23	9	11	3	4	13	19	4	6
Q4DCU5	Uncharacterized protein OS=Trypanosoma cruzi (strain CL Brener) OX=353153 GN=Tc00.1047053506839.30 PE=4 SV=1 - [Q4DCU5_TRYCC]	119.4	5.01	8	6	8	8	9	9	13	11
Q4DJZ1	Uncharacterized protein OS=Trypanosoma cruzi (strain CL Brener) OX=353153 GN=Tc00.1047053509671.110 PE=4 SV=1 - [Q4DJZ1_TRYCC]	82.8	7.64	8	7	4	4	9	8	6	5
Q4CXF6	Serine/threonine-protein kinase A, putative OS=Trypanosoma cruzi (strain CL Brener) OX=353153 GN=Tc00.1047053507897.30 PE=4 SV=1 - [Q4CXF6_TRYCC]	57.8	7.88	7	5	5	5	9	7	7	8
Q4CPG2	Dynein heavy chain, putative (Fragment) OS=Trypanosoma cruzi (strain CL Brener) OX=353153 GN=Tc00.1047053509583.19 PE=4 SV=1 - [Q4CPG2_TRYCC]	90.2	5.19	7	12	7	6	8	14	8	8
Q4CZ79	Trans-sialidase, putative OS=Trypanosoma cruzi (strain CL Brener) OX=353153 GN=Tc00.1047053509495.30 PE=4 SV=1 - [Q4CZ79_TRYCC]	99.4	6.48	7	10	11	10	12	14	18	19
Q4E268	Proteasome regulatory non-ATPase subunit 7, putative OS=Trypanosoma cruzi (strain CL Brener) OX=353153 GN=Tc00.1047053508707.90 PE=4 SV=1 - [Q4E268_TRYCC]	46.2	5.55	6	8	5	8	6	14	7	10
Q4E686	Aminopeptidase OS=Trypanosoma cruzi (strain CL Brener) OX=353153 GN=Tc00.1047053508153.60 PE=3 SV=1 - [Q4E686_TRYCC]	97	6.34	6	12	2		6	16	4
Q4E3B3	Proteasome regulatory non-ATPase subunit 3, putative OS=Trypanosoma cruzi (strain CL Brener) OX=353153 GN=Tc00.1047053508355.150 PE=4 SV=1 - [Q4E3B3_TRYCC]	38	6.8	6	3	7	6	9	3	11	7
Q4CSN9	Casein kinase, putative OS=Trypanosoma cruzi (strain CL Brener) OX=353153 GN=Tc00.1047053507541.40 PE=3 SV=1 - [Q4CSN9_TRYCC]	38.1	9.31	5	12	6	7	6	18	9	11
Q4CWX1	Adenylosuccinate synthetase 2 OS=Trypanosoma cruzi (strain CL Brener) OX=353153 GN=Tc00.1047053508731.60 PE=3 SV=1 - [PURA2_TRYCC]	68.4	8.21	5	4	3	5	5	4	5	7
Q4CW22	Uncharacterized protein OS=Trypanosoma cruzi (strain CL Brener) OX=353153 GN=Tc00.1047053504001.20 PE=4 SV=1 - [Q4CW22_TRYCC]	13	8.12	5	2	3	2	6	2	4	2
Q4DGP4	Uncharacterized protein OS=Trypanosoma cruzi (strain CL Brener) OX=353153 GN=Tc00.1047053506835.110 PE=4 SV=1 - [Q4DGP4_TRYCC]	82.9	6.32	5	3	4	5	5	8	8	7
Q4DR16	Trans-sialidase, putative OS=Trypanosoma cruzi (strain CL Brener) OX=353153 GN=Tc00.1047053507953.140 PE=4 SV=1 - [Q4DR16_TRYCC]	82.2	6.28	5	7	4	4	5	10	7	5
Q4CUC3	Trans-sialidase, putative (Fragment) OS=Trypanosoma cruzi (strain CL Brener) OX=353153 GN=Tc00.1047053506231.10 PE=4 SV=1 - [Q4CUC3_TRYCC]	35.7	5.14	5	5	4	5	5	18	9	10
Q4DQZ8	Uncharacterized protein OS=Trypanosoma cruzi (strain CL Brener) OX=353153 GN=Tc00.1047053510089.110 PE=4 SV=1 - [Q4DQZ8_TRYCC]	72.3	7.42	5	3	7	9	6	4	8	10
Q4CRW0	ATP-dependent Clp protease subunit, heat shock protein 78, putative (Fragment) OS=Trypanosoma cruzi (strain CL Brener) OX=353153 GN=Tc00.1047053509125.20 PE=4 SV=1 - [Q4CRW0_TRYCC]	41.5	6.4	5	4	9	9	6	5	11	11
Q4CQE6	Casein kinase, putative OS=Trypanosoma cruzi (strain CL Brener) OX=353153 GN=Tc00.1047053507305.20 PE=3 SV=1 - [Q4CQE6_TRYCC]	38.1	9.32	5	11	7	7	6	17	11	10
Q4DKP5	Dynein heavy chain, putative (Fragment) OS=Trypanosoma cruzi (strain CL Brener) OX=353153 GN=Tc00.1047053511867.209 PE=4 SV=1 - [Q4DKP5_TRYCC]	68.1	5.88	5	8			5	8
Q4DH96	ATP-dependent RNA helicase, putative OS=Trypanosoma cruzi (strain CL Brener) OX=353153 GN=Tc00.1047053511285.120 PE=3 SV=1 - [Q4DH96_TRYCC]	68.6	8.98	5	6	10	6	7	7	10	10
Q4CVU6	Uncharacterized protein OS=Trypanosoma cruzi (strain CL Brener) OX=353153 GN=Tc00.1047053509243.30 PE=4 SV=1 - [Q4CVU6_TRYCC]	69.2	5.81	5	3	3	5	8	3	3	6
Q4D9J1	Proteasome regulatory ATPase subunit 1, putative OS=Trypanosoma cruzi (strain CL Brener) OX=353153 GN=Tc00.1047053506857.90 PE=3 SV=1 - [Q4D9J1_TRYCC]	48.5	7.46	4	2	9	5	4	2	10	5
Q4D4S1	40S ribosomal protein S9, putative OS=Trypanosoma cruzi (strain CL Brener) OX=353153 GN=Tc00.1047053504163.30 PE=1 SV=1 - [Q4D4S1_TRYCC]	22.1	10.48	4	2	3		6	2	3
Q4DSV5	Protein kinase A regulatory subunit, putative OS=Trypanosoma cruzi (strain CL Brener) OX=353153 GN=Tc00.1047053506227.150 PE=4 SV=1 - [Q4DSV5_TRYCC]	56.7	5.2	4	6	3	2	4	7	3	2
Q4DK33	Coatomer gamma subunit, putative (Fragment) OS=Trypanosoma cruzi (strain CL Brener) OX=353153 GN=Tc00.1047053508827.139 PE=4 SV=1 - [Q4DK33_TRYCC]	83.6	5.38	4	5	3	4	5	5	3	5
Q4D4E6	Dynein intermediate chain, putative OS=Trypanosoma cruzi (strain CL Brener) OX=353153 GN=Tc00.1047053507857.60 PE=4 SV=1 - [Q4D4E6_TRYCC]	74.7	6.28	4	4	6	9	4	5	8	11
Q4DVH1	Proteasome regulatory ATPase subunit 5, putative OS=Trypanosoma cruzi (strain CL Brener) OX=353153 GN=Tc00.1047053506859.20 PE=3 SV=1 - [Q4DVH1_TRYCC]	49	5.94	4	4	7	8	6	4	10	10
Q4CZ80	Trans-sialidase, putative OS=Trypanosoma cruzi (strain CL Brener) OX=353153 GN=Tc00.1047053507753.10 PE=4 SV=1 - [Q4CZ80_TRYCC]	113.8	5.24	4	6	8	8	6	8	16	15
Q4DQ33	Alanine--tRNA ligase OS=Trypanosoma cruzi (strain CL Brener) OX=353153 GN=Tc00.1047053511825.220 PE=3 SV=1 - [Q4DQ33_TRYCC]	106.1	5.73	4	3	3	3	5	4	3	3
Q4CUZ0	Trans-sialidase, putative OS=Trypanosoma cruzi (strain CL Brener) OX=353153 GN=Tc00.1047053510331.10 PE=4 SV=1 - [Q4CUZ0_TRYCC]	106.2	5.15	4	3	6	6	6	7	12	12
Q4CW60	Coatomer beta subunit, putative (Fragment) OS=Trypanosoma cruzi (strain CL Brener) OX=353153 GN=Tc00.1047053509003.79 PE=4 SV=1 - [Q4CW60_TRYCC]	29.5	7.46	4	3	2	3	5	3	3	3
Q4DBC3	Glutamine-dependent carbamoyl-phosphate synthetase, putative (Fragment) OS=Trypanosoma cruzi (strain CL Brener) OX=353153 GN=Tc00.1047053507059.80 PE=4 SV=1 - [Q4DBC3_TRYCC]	73.1	7.9	4	4		3	6	5		3
Q4DPR3	Mitochondrial processing peptidase, beta subunit, putative OS=Trypanosoma cruzi (strain CL Brener) OX=353153 GN=Tc00.1047053511181.50 PE=4 SV=1 - [Q4DPR3_TRYCC]	54.2	7.18	4	2	3	6	4	2	3	7
Q4CRR8	Trans-sialidase, putative OS=Trypanosoma cruzi (strain CL Brener) OX=353153 GN=Tc00.1047053507283.10 PE=4 SV=1 - [Q4CRR8_TRYCC]	78.6	8.78	4	5	4	2	4	8	5	3
Q4E0P7	Uncharacterized protein OS=Trypanosoma cruzi (strain CL Brener) OX=353153 GN=Tc00.1047053506297.220 PE=4 SV=1 - [Q4E0P7_TRYCC]	27.6	9.2	4	3	3	2	8	6	4	2
Q4DIB9	GTP-binding nuclear protein OS=Trypanosoma cruzi (strain CL Brener) OX=353153 GN=Tc00.1047053509455.80 PE=3 SV=1 - [Q4DIB9_TRYCC]	24.4	7.36	4	3	3		5	3	3
Q4CYA0	Proteasome regulatory non-ATPase subunit 11, putative OS=Trypanosoma cruzi (strain CL Brener) OX=353153 GN=Tc00.1047053509627.30 PE=4 SV=1 - [Q4CYA0_TRYCC]	40.7	9.73	4	4	5	5	4	5	7	6
Q4CLI9	Retrotransposon hot spot (RHS) protein, putative (Fragment) OS=Trypanosoma cruzi (strain CL Brener) OX=353153 GN=Tc00.1047053506421.10 PE=4 SV=1 - [Q4CLI9_TRYCC]	39.8	9.09	4	2		2	4	2		2
Q4D747	Alanine--tRNA ligase OS=Trypanosoma cruzi (strain CL Brener) OX=353153 GN=Tc00.1047053506863.10 PE=3 SV=1 - [Q4D747_TRYCC]	106.1	5.88	4	4	3	3	6	5	3	3
Q4CSG0	Trans-sialidase, putative OS=Trypanosoma cruzi (strain CL Brener) OX=353153 GN=Tc00.1047053509629.10 PE=4 SV=1 - [Q4CSG0_TRYCC]	101.3	4.97	4	8	9	8	5	21	19	19
Q4CXV0	Trans-sialidase, putative (Fragment) OS=Trypanosoma cruzi (strain CL Brener) OX=353153 GN=Tc00.1047053506413.89 PE=4 SV=1 - [Q4CXV0_TRYCC]	76.7	6.55	4	11	6	7	5	16	7	10
Q4DWU3	26S proteasome regulatory non-ATPase subunit, putative (Fragment) OS=Trypanosoma cruzi (strain CL Brener) OX=353153 GN=Tc00.1047053508409.9 PE=4 SV=1 - [Q4DWU3_TRYCC]	31.5	5.58	4	3	2	3	4	4	3	3
Q4DAV6	ATP synthase F1 subunit gamma protein, putative OS=Trypanosoma cruzi (strain CL Brener) OX=353153 GN=Tc00.1047053504069.80 PE=4 SV=1 - [Q4DAV6_TRYCC]	34.6	9.36	4	3	2	2	4	3	2	2
Q4DU07	Trans-sialidase, putative OS=Trypanosoma cruzi (strain CL Brener) OX=353153 GN=Tc00.1047053506499.170 PE=4 SV=1 - [Q4DU07_TRYCC]	82.9	8.56	4	7	7	4	4	12	11	5
Q4E4R0	60S ribosomal protein L23, putative OS=Trypanosoma cruzi (strain CL Brener) OX=353153 GN=Tc00.1047053508461.490 PE=1 SV=1 - [Q4E4R0_TRYCC]	14.9	10.29	3	2			5	3
Q4DMU8	Reticulon-like protein OS=Trypanosoma cruzi (strain CL Brener) OX=353153 GN=Tc00.1047053511517.37 PE=4 SV=1 - [Q4DMU8_TRYCC]	21	8.92	3	3		2	9	5		3
Q4DCB6	Ribonucleoside-diphosphate reductase OS=Trypanosoma cruzi (strain CL Brener) OX=353153 GN=Tc00.1047053506933.20 PE=3 SV=1 - [Q4DCB6_TRYCC]	90.6	7.53	3	2	2	2	4	2	2	2
Q4CRH9	40S ribosomal protein S11, putative OS=Trypanosoma cruzi (strain CL Brener) OX=353153 GN=Tc00.1047053511139.20 PE=3 SV=1 - [Q4CRH9_TRYCC]	19.9	10.42	3	3	2	3	4	3	5	6
Q4DKG4	Proteasome regulatory non-ATPase subunit 11, putative (Fragment) OS=Trypanosoma cruzi (strain CL Brener) OX=353153 GN=Tc00.1047053503697.9 PE=4 SV=1 - [Q4DKG4_TRYCC]	29.5	8	3	3	4	5	3	3	4	5
Q4D4X1	Succinate dehydrogenase [ubiquinone] flavoprotein subunit, mitochondrial OS=Trypanosoma cruzi (strain CL Brener) OX=353153 GN=Tc00.1047053511909.40 PE=3 SV=1 - [Q4D4X1_TRYCC]	66.9	6.67	3	3	2		6	4	3
Q4CUE8	Trans-sialidase, putative OS=Trypanosoma cruzi (strain CL Brener) OX=353153 GN=Tc00.1047053509377.20 PE=4 SV=1 - [Q4CUE8_TRYCC]	85.7	5.31	3	4	4	5	4	8	7	11
Q4DQA9	Trans-sialidase, putative OS=Trypanosoma cruzi (strain CL Brener) OX=353153 GN=Tc00.1047053511827.110 PE=4 SV=1 - [Q4DQA9_TRYCC]	78.4	6.49	3	6	4	3	6	8	5	4
Q4DTD3	Trans-sialidase, putative OS=Trypanosoma cruzi (strain CL Brener) OX=353153 GN=Tc00.1047053509157.170 PE=4 SV=1 - [Q4DTD3_TRYCC]	107.3	4.97	3	3	3	4	4	3	3	5
Q4E2R3	Uncharacterized protein OS=Trypanosoma cruzi (strain CL Brener) OX=353153 GN=Tc00.1047053504153.200 PE=4 SV=1 - [Q4E2R3_TRYCC]	34	6.55	3	3	6	4	3	4	9	5
Q4DYM3	Trans-sialidase, putative OS=Trypanosoma cruzi (strain CL Brener) OX=353153 GN=Tc00.1047053504427.230 PE=4 SV=1 - [Q4DYM3_TRYCC]	108.6	4.88	3	4	5	5	6	5	7	8
Q4DY53	Uncharacterized protein OS=Trypanosoma cruzi (strain CL Brener) OX=353153 GN=Tc00.1047053511727.50 PE=4 SV=1 - [Q4DY53_TRYCC]	101.2	6.86	3	2	5	3	3	2	5	3
Q4E2A1	Trans-sialidase, putative OS=Trypanosoma cruzi (strain CL Brener) OX=353153 GN=Tc00.1047053511603.450 PE=4 SV=1 - [Q4E2A1_TRYCC]	83.2	7.93	3	2	4	3	3	4	6	4
Q4D826	Retrotransposon hot spot (RHS) protein, putative OS=Trypanosoma cruzi (strain CL Brener) OX=353153 GN=Tc00.1047053508285.10 PE=4 SV=1 - [Q4D826_TRYCC]	67.6	8.05	3	3			3	3
Q4D2F2	Isoleucyl-tRNA synthetase, putative OS=Trypanosoma cruzi (strain CL Brener) OX=353153 GN=Tc00.1047053509797.40 PE=3 SV=1 - [Q4D2F2_TRYCC]	132.3	7.25	3	3			3	4
Q4DLR5	Trans-sialidase, putative OS=Trypanosoma cruzi (strain CL Brener) OX=353153 GN=Tc00.1047053509549.10 PE=4 SV=1 - [Q4DLR5_TRYCC]	85.4	7.03	3	2	6	6	3	2	9	7
Q4DP82	Trans-sialidase, putative OS=Trypanosoma cruzi (strain CL Brener) OX=353153 GN=Tc00.1047053506967.10 PE=4 SV=1 - [Q4DP82_TRYCC]	83.2	7.56	3	3	5	4	3	5	8	4
Q4D6K1	Trans-sialidase, putative (Fragment) OS=Trypanosoma cruzi (strain CL Brener) OX=353153 GN=Tc00.1047053511855.10 PE=4 SV=1 - [Q4D6K1_TRYCC]	46.7	8.72	3	7	3	4	3	11	4	5
Q4CKW5	Dynein heavy chain, putative (Fragment) OS=Trypanosoma cruzi (strain CL Brener) OX=353153 GN=Tc00.1047053474341.9 PE=4 SV=1 - [Q4CKW5_TRYCC]	57	5.96	3	4			3	5
Q4D2U8	UTP--glucose-1-phosphate uridylyltransferase OS=Trypanosoma cruzi (strain CL Brener) OX=353153 GN=Tc00.1047053506359.60 PE=3 SV=1 - [Q4D2U8_TRYCC]	53.4	6.02	3	4	3	2	3	4	4	3
Q4DME9	Retrotransposon hot spot (RHS) protein, putative OS=Trypanosoma cruzi (strain CL Brener) OX=353153 GN=Tc00.1047053506443.150 PE=4 SV=1 - [Q4DME9_TRYCC]	91.9	6.38	3	5	7	2	5	5	8	2
Q4D371	Trans-sialidase, putative OS=Trypanosoma cruzi (strain CL Brener) OX=353153 GN=Tc00.1047053506597.40 PE=4 SV=1 - [Q4D371_TRYCC]	82.8	8.29	3	3	3	3	3	3	5	4
Q4CMD9	Fatty acyl CoA synthetase 2, putative OS=Trypanosoma cruzi (strain CL Brener) OX=353153 GN=Tc00.1047053506261.10 PE=4 SV=1 - [Q4CMD9_TRYCC]	78.3	6.33	3	4			3	5
Q4DIN5	Trans-sialidase, putative OS=Trypanosoma cruzi (strain CL Brener) OX=353153 GN=Tc00.1047053508045.120 PE=4 SV=1 - [Q4DIN5_TRYCC]	108.8	4.82	3	6	7	8	5	8	10	11
Q4DW08	Proteasome regulatory ATPase subunit 3, putative OS=Trypanosoma cruzi (strain CL Brener) OX=353153 GN=Tc00.1047053507603.200 PE=3 SV=1 - [Q4DW08_TRYCC]	44.7	7.21	3	5	7	7	5	5	9	11
Q4DVJ1	Trans-sialidase, putative OS=Trypanosoma cruzi (strain CL Brener) OX=353153 GN=Tc00.1047053506961.25 PE=4 SV=1 - [Q4DVJ1_TRYCC]	107.8	4.83	3	6	7	5	3	6	9	7
Q4CND5	26S proteasome regulatory non-ATPase subunit, putative (Fragment) OS=Trypanosoma cruzi (strain CL Brener) OX=353153 GN=Tc00.1047053504221.20 PE=4 SV=1 - [Q4CND5_TRYCC]	28.5	9.28	3	3	3	3	7	7	4	6
Q4CT78	Fatty acyl CoA synthetase 2, putative OS=Trypanosoma cruzi (strain CL Brener) OX=353153 GN=Tc00.1047053504177.20 PE=4 SV=1 - [Q4CT78_TRYCC]	78.5	6.14	3	6		2	4	13		2
Q4CRT3	Trans-sialidase, putative OS=Trypanosoma cruzi (strain CL Brener) OX=353153 GN=Tc00.1047053503907.10 PE=4 SV=1 - [Q4CRT3_TRYCC]	99.6	4.98	3	2	6	7	5	2	9	11
Q4DFP2	Trans-sialidase, putative OS=Trypanosoma cruzi (strain CL Brener) OX=353153 GN=Tc00.1047053504425.10 PE=4 SV=1 - [Q4DFP2_TRYCC]	108	4.98	3	4	7	8	5	8	14	14
Q4DLM7	Trans-sialidase, putative OS=Trypanosoma cruzi (strain CL Brener) OX=353153 GN=Tc00.1047053508857.30 PE=4 SV=1 - [Q4DLM7_TRYCC]	78.9	5.55	3	6	7	10	6	9	14	19
Q4DWH2	Dynein, putative OS=Trypanosoma cruzi (strain CL Brener) OX=353153 GN=Tc00.1047053511725.180 PE=4 SV=1 - [Q4DWH2_TRYCC]	68.5	6.16	3	2	2	3	4	3	3	3
Q4E3C3	Trans-sialidase, putative OS=Trypanosoma cruzi (strain CL Brener) OX=353153 GN=Tc00.1047053508355.80 PE=4 SV=1 - [Q4E3C3_TRYCC]	101.8	5	3	3	4	4	5	4	6	6
Q4D5K4	Uncharacterized protein (Fragment) OS=Trypanosoma cruzi (strain CL Brener) OX=353153 GN=Tc00.1047053511527.9 PE=4 SV=1 - [Q4D5K4_TRYCC]	175.9	6.6	3	3			3	3
Q4CM92	Uncharacterized protein OS=Trypanosoma cruzi (strain CL Brener) OX=353153 GN=Tc00.1047053508955.20 PE=4 SV=1 - [Q4CM92_TRYCC]	26.6	7.44	3	3	2	2	4	4	5	2
Q4CSI1	Trans-sialidase, putative OS=Trypanosoma cruzi (strain CL Brener) OX=353153 GN=Tc00.1047053507427.10 PE=4 SV=1 - [Q4CSI1_TRYCC]	88.8	5.44	3	6	8	5	3	6	11	7
Q4D0V0	Uncharacterized protein OS=Trypanosoma cruzi (strain CL Brener) OX=353153 GN=Tc00.1047053508319.30 PE=4 SV=1 - [Q4D0V0_TRYCC]	47	6.48	3	2	2	2	3	2	2	2
Q4D349	Trans-sialidase, putative OS=Trypanosoma cruzi (strain CL Brener) OX=353153 GN=Tc00.1047053506603.40 PE=4 SV=1 - [Q4D349_TRYCC]	82.4	8.25	3	5	4	2	3	9	8	3
Q4CZP0	Trans-sialidase, putative OS=Trypanosoma cruzi (strain CL Brener) OX=353153 GN=Tc00.1047053509817.50 PE=4 SV=1 - [Q4CZP0_TRYCC]	79	5.76	3	3	4	6	4	4	9	7
Q4E5U1	Trans-sialidase, putative OS=Trypanosoma cruzi (strain CL Brener) OX=353153 GN=Tc00.1047053508221.790 PE=4 SV=1 - [Q4E5U1_TRYCC]	84.5	8.25	3	2		2	3	2		2
Q4CPQ3	Trans-sialidase, putative OS=Trypanosoma cruzi (strain CL Brener) OX=353153 GN=Tc00.1047053509333.10 PE=4 SV=1 - [Q4CPQ3_TRYCC]	108.9	4.92	3	6	9	10	4	8	13	13
Q4CXQ1	Retrotransposon hot spot (RHS) protein, putative OS=Trypanosoma cruzi (strain CL Brener) OX=353153 GN=Tc00.1047053509219.20 PE=4 SV=1 - [Q4CXQ1_TRYCC]	139.2	6.37	3	2			3	2
Q4D9X2	Coatomer alpha subunit, putative (Fragment) OS=Trypanosoma cruzi (strain CL Brener) OX=353153 GN=Tc00.1047053510687.149 PE=4 SV=1 - [Q4D9X2_TRYCC]	32.4	8.21	3	3		2	4	8		3
Q4CR38	Membrane associated protein, putative (Fragment) OS=Trypanosoma cruzi (strain CL Brener) OX=353153 GN=Tc00.1047053510649.24 PE=3 SV=1 - [Q4CR38_TRYCC]	240.5	6.3	3	2			3	2
Q4DYS1	Aldehyde dehydrogenase, putative OS=Trypanosoma cruzi (strain CL Brener) OX=353153 GN=Tc00.1047053507641.60 PE=3 SV=1 - [Q4DYS1_TRYCC]	54.1	7.61	3	2	5	4	3	2	7	5
Q4DQV8	Trans-sialidase, putative OS=Trypanosoma cruzi (strain CL Brener) OX=353153 GN=Tc00.1047053511911.60 PE=4 SV=1 - [Q4DQV8_TRYCC]	113.6	5.05	3	3	5	5	5	5	8	10
Q4E0Q3	40S ribosomal protein S5, putative OS=Trypanosoma cruzi (strain CL Brener) OX=353153 GN=Tc00.1047053506297.150 PE=1 SV=1 - [Q4E0Q3_TRYCC]	21.2	10.26	3		2		4		2
Q4DJI6	Histone-lysine N-methyltransferase OS=Trypanosoma cruzi (strain CL Brener) OX=353153 GN=Tc00.1047053509551.140 PE=4 SV=1 - [Q4DJI6_TRYCC]	159.7	6.44	3		2	2	5		2	2
Q4D3F7	Uncharacterized protein OS=Trypanosoma cruzi (strain CL Brener) OX=353153 GN=Tc00.1047053508719.70 PE=4 SV=1 - [Q4D3F7_TRYCC]	44.1	9.96	3		9	9	4		10	13
Q4DDM9	Serine/threonine-protein phosphatase OS=Trypanosoma cruzi (strain CL Brener) OX=353153 GN=Tc00.1047053507601.10 PE=3 SV=1 - [Q4DDM9_TRYCC]	71.3	7.47	3		3	5	4		5	7
Q4DZY6	Uncharacterized protein OS=Trypanosoma cruzi (strain CL Brener) OX=353153 GN=Tc00.1047053509805.210 PE=4 SV=1 - [Q4DZY6_TRYCC]	111	6.71	3			3	4			3
Q4CZ95	Trans-sialidase, putative OS=Trypanosoma cruzi (strain CL Brener) OX=353153 GN=Tc00.1047053508581.40 PE=4 SV=1 - [Q4CZ95_TRYCC]	75.4	7.2	2	5	4	4	2	5	4	5
Q4D203	Fatty acyl CoA synthetase, putative OS=Trypanosoma cruzi (strain CL Brener) OX=353153 GN=Tc00.1047053503575.50 PE=4 SV=1 - [Q4D203_TRYCC]	78.5	7.88	2	2	5	3	3	4	8	3
Q4DLC5	Trans-sialidase, putative OS=Trypanosoma cruzi (strain CL Brener) OX=353153 GN=Tc00.1047053506595.40 PE=4 SV=1 - [Q4DLC5_TRYCC]	72.6	7.01	2	6	2	2	2	9	2	3
Q4E0P2	60S ribosomal protein L28, putative OS=Trypanosoma cruzi (strain CL Brener) OX=353153 GN=Tc00.1047053506297.270 PE=4 SV=1 - [Q4E0P2_TRYCC]	16.4	11.63	2	2	3	2	2	3	4	3
Q4E088	40S ribosomal protein S10, putative OS=Trypanosoma cruzi (strain CL Brener) OX=353153 GN=Tc00.1047053506679.140 PE=1 SV=1 - [Q4E088_TRYCC]	18.2	10.29	2	2		2	4	3		2
Q4D1E6	Surface protease GP63, putative OS=Trypanosoma cruzi (strain CL Brener) OX=353153 GN=Tc00.1047053504669.30 PE=4 SV=1 - [Q4D1E6_TRYCC]	61.8	7.33	2	3			2	3
Q4DWX0	NIMA-related kinase, putative OS=Trypanosoma cruzi (strain CL Brener) OX=353153 GN=Tc00.1047053506885.280 PE=4 SV=1 - [Q4DWX0_TRYCC]	54.2	7.18	2	2			2	2
Q4CPV7	Eukaryotic translation initiation factor 2 subunit, putative OS=Trypanosoma cruzi (strain CL Brener) OX=353153 GN=Tc00.1047053503819.30 PE=4 SV=1 - [Q4CPV7_TRYCC]	52.5	7.03	2	2	2	2	2	2	3	2
Q4D6I5	40S ribosomal protein S14, putative OS=Trypanosoma cruzi (strain CL Brener) OX=353153 GN=Tc00.1047053409117.20 PE=1 SV=1 - [Q4D6I5_TRYCC]	15.6	9.94	2	2	2	2	2	2	2	2
Q4DV43	Triosephosphate isomerase OS=Trypanosoma cruzi (strain CL Brener) OX=353153 GN=Tc00.1047053508647.200 PE=3 SV=1 - [Q4DV43_TRYCC]	27.3	8.43	2	3	2		3	4	2
Q4DJJ9	Mitochondrial phosphate transporter, putative OS=Trypanosoma cruzi (strain CL Brener) OX=353153 GN=Tc00.1047053509551.30 PE=3 SV=1 - [Q4DJJ9_TRYCC]	34.3	9.23	2	2			2	2
Q4DG65	Isocitrate dehydrogenase [NADP] OS=Trypanosoma cruzi (strain CL Brener) OX=353153 GN=Tc00.1047053511575.60 PE=3 SV=1 - [Q4DG65_TRYCC]	48.7	8.63	2	6	5	5	4	7	7	5
Q4DKK5	Carnitine/choline acetyltransferase, putative OS=Trypanosoma cruzi (strain CL Brener) OX=353153 GN=Tc00.1047053509999.90 PE=4 SV=1 - [Q4DKK5_TRYCC]	66.9	6.65	2	4	7	5	3	4	8	7
Q4D8I3	Uncharacterized protein (Fragment) OS=Trypanosoma cruzi (strain CL Brener) OX=353153 GN=Tc00.1047053511383.89 PE=4 SV=1 - [Q4D8I3_TRYCC]	247.7	6.06	2	2			2	3
Q4CUD0	Trans-sialidase, putative (Fragment) OS=Trypanosoma cruzi (strain CL Brener) OX=353153 GN=Tc00.1047053507219.9 PE=4 SV=1 - [Q4CUD0_TRYCC]	90.5	5.86	2	3	4	4	4	3	6	5
Q4D1E7	Trans-sialidase, putative OS=Trypanosoma cruzi (strain CL Brener) OX=353153 GN=Tc00.1047053508963.30 PE=4 SV=1 - [Q4D1E7_TRYCC]	113.4	5.06	2	3	2	3	2	3	2	4
Q4E397	Arginyl-tRNA synthetase, putative OS=Trypanosoma cruzi (strain CL Brener) OX=353153 GN=Tc00.1047053508355.320 PE=3 SV=1 - [Q4E397_TRYCC]	78.8	6.57	2	3			4	3
Q4DY15	Uncharacterized protein OS=Trypanosoma cruzi (strain CL Brener) OX=353153 GN=Tc00.1047053506357.130 PE=4 SV=1 - [Q4DY15_TRYCC]	287.5	6.7	2	5			2	8
Q4D3D0	Trans-sialidase, putative (Fragment) OS=Trypanosoma cruzi (strain CL Brener) OX=353153 GN=Tc00.1047053508297.7 PE=4 SV=1 - [Q4D3D0_TRYCC]	49.5	5.74	2	6	7	7	2	8	11	12
Q4DUI3	ATP-dependent RNA helicase, putative OS=Trypanosoma cruzi (strain CL Brener) OX=353153 GN=Tc00.1047053510661.90 PE=3 SV=1 - [Q4DUI3_TRYCC]	89.5	7.62	2	2	3	4	3	2	4	4
Q4DST7	60S ribosomal protein L32, putative OS=Trypanosoma cruzi (strain CL Brener) OX=353153 GN=Tc00.1047053510769.90 PE=4 SV=1 - [Q4DST7_TRYCC]	15.4	11.25	2	2			2	4
Q4CQ33	Metacaspase, putative OS=Trypanosoma cruzi (strain CL Brener) OX=353153 GN=Tc00.1047053507297.30 PE=4 SV=1 - [Q4CQ33_TRYCC]	38.9	6.54	2	2	2	2	2	3	3	4
Q4CYH9	Histone H2A (Fragment) OS=Trypanosoma cruzi (strain CL Brener) OX=353153 GN=Tc00.1047053508321.11 PE=3 SV=1 - [Q4CYH9_TRYCC]	11.5	10.86	2	2		2	3	3		2
Q4DCY2	Uncharacterized protein OS=Trypanosoma cruzi (strain CL Brener) OX=353153 GN=Tc00.1047053509895.20 PE=4 SV=1 - [Q4DCY2_TRYCC]	93.8	9.51	2	2	2	4	2	2	2	4
Q4D7C1	Trans-sialidase, putative (Fragment) OS=Trypanosoma cruzi (strain CL Brener) OX=353153 GN=Tc00.1047053511237.130 PE=4 SV=1 - [Q4D7C1_TRYCC]	20.2	6.62	2	3	3	4	2	5	4	7
Q4DYG6	Uncharacterized protein OS=Trypanosoma cruzi (strain CL Brener) OX=353153 GN=Tc00.1047053511367.290 PE=4 SV=1 - [Q4DYG6_TRYCC]	28.1	9.22	2	4	2	3	3	9	2	3
Q4CM23	Trans-sialidase, putative (Fragment) OS=Trypanosoma cruzi (strain CL Brener) OX=353153 GN=Tc00.1047053508343.10 PE=4 SV=1 - [Q4CM23_TRYCC]	34.4	5.66	2	3	3	3	2	5	7	6
Q4CTX4	Trans-sialidase, putative OS=Trypanosoma cruzi (strain CL Brener) OX=353153 GN=Tc00.1047053506841.20 PE=4 SV=1 - [Q4CTX4_TRYCC]	85.9	5.94	2	2	4		2	2	4
Q4D5R2	Vesicle-fusing ATPase, putative OS=Trypanosoma cruzi (strain CL Brener) OX=353153 GN=Tc00.1047053506477.20 PE=4 SV=1 - [Q4D5R2_TRYCC]	79.5	6.02	2	2	5	3	3	2	5	3
Q4CPG3	Chaperonin TCP20, putative OS=Trypanosoma cruzi (strain CL Brener) OX=353153 GN=Tc00.1047053509583.10 PE=3 SV=1 - [Q4CPG3_TRYCC]	59	7.69	2	3	5		3	3	6
Q4DUN5	Metacaspase, putative OS=Trypanosoma cruzi (strain CL Brener) OX=353153 GN=Tc00.1047053509399.20 PE=4 SV=1 - [Q4DUN5_TRYCC]	39	6.95	2	2		2	2	4		4
Q4DKH6	Retrotransposon hot spot (RHS) protein, putative OS=Trypanosoma cruzi (strain CL Brener) OX=353153 GN=Tc00.1047053509915.60 PE=4 SV=1 - [Q4DKH6_TRYCC]	67.5	6.93	2	2			2	2
Q4E5F8	Phosphatidic acid phosphatase, putative OS=Trypanosoma cruzi (strain CL Brener) OX=353153 GN=Tc00.1047053511277.359 PE=4 SV=1 - [Q4E5F8_TRYCC]	35.4	9.6	2	3			2	3
Q4CQ18	Dihydrolipoamide dehydrogenase, putative OS=Trypanosoma cruzi (strain CL Brener) OX=353153 GN=Tc00.1047053509379.10 PE=4 SV=1 - [Q4CQ18_TRYCC]	56.6	8.38	2	7	2	4	3	7	3	5
Q4CQZ7	Trans-sialidase, putative OS=Trypanosoma cruzi (strain CL Brener) OX=353153 GN=Tc00.1047053503993.10 PE=4 SV=1 - [Q4CQZ7_TRYCC]	76.6	8.51	2	5	6	8	3	7	10	14
Q4E2W0	Glutamine synthetase, putative OS=Trypanosoma cruzi (strain CL Brener) OX=353153 GN=Tc00.1047053508175.370 PE=3 SV=1 - [Q4E2W0_TRYCC]	49.5	7.24	2	3	4	4	2	4	4	5
Q4E0M8	Trans-sialidase, putative OS=Trypanosoma cruzi (strain CL Brener) OX=353153 GN=Tc00.1047053510307.240 PE=4 SV=1 - [Q4E0M8_TRYCC]	113.5	4.97	2	2	3	4	4	2	5	5
Q4E3I6	Fumarate hydratase, putative OS=Trypanosoma cruzi (strain CL Brener) OX=353153 GN=Tc00.1047053510329.270 PE=4 SV=1 - [Q4E3I6_TRYCC]	62.2	7.28	2	5	2	2	4	7	3	2
Q4DJB1	Uncharacterized protein OS=Trypanosoma cruzi (strain CL Brener) OX=353153 GN=Tc00.1047053505037.30 PE=4 SV=1 - [Q4DJB1_TRYCC]	43.6	5.34	2	2	2	2	3	3	2	2
Q4DIA8	Serine/threonine protein phosphatase 2A regulatory subunit, putative OS=Trypanosoma cruzi (strain CL Brener) OX=353153 GN=Tc00.1047053506479.39 PE=4 SV=1 - [Q4DIA8_TRYCC]	62.9	6.68	2	2			2	2
Q4CKS7	Dynein heavy chain, putative (Fragment) OS=Trypanosoma cruzi (strain CL Brener) OX=353153 GN=Tc00.1047053511869.9 PE=4 SV=1 - [Q4CKS7_TRYCC]	55.9	7.72	2	2			2	2
Q4CM87	Surface protease GP63, putative OS=Trypanosoma cruzi (strain CL Brener) OX=353153 GN=Tc00.1047053509035.20 PE=4 SV=1 - [Q4CM87_TRYCC]	72.3	7.46	2	4	3	5	2	6	5	9
Q4DM53	Uncharacterized protein OS=Trypanosoma cruzi (strain CL Brener) OX=353153 GN=Tc00.1047053506425.40 PE=4 SV=1 - [Q4DM53_TRYCC]	118.1	4.91	2	4			2	4
Q4CX42	Dihydrolipoamide dehydrogenase, putative OS=Trypanosoma cruzi (strain CL Brener) OX=353153 GN=Tc00.1047053508933.20 PE=4 SV=1 - [Q4CX42_TRYCC]	60.9	7.99	2	4	3	2	2	4	4	3
Q4D3Z5	Dynein heavy chain, putative (Fragment) OS=Trypanosoma cruzi (strain CL Brener) OX=353153 GN=Tc00.1047053511865.90 PE=4 SV=1 - [Q4D3Z5_TRYCC]	43.4	6.47	2	3	2		2	3	2
Q4DZC9	Retrotransposon hot spot (RHS) protein, putative (Fragment) OS=Trypanosoma cruzi (strain CL Brener) OX=353153 GN=Tc00.1047053506537.299 PE=4 SV=1 - [Q4DZC9_TRYCC]	78.8	9.14	2	2			2	2
Q4D0B9	Proteasome regulatory ATPase subunit 2, putative OS=Trypanosoma cruzi (strain CL Brener) OX=353153 GN=Tc00.1047053511047.50 PE=3 SV=1 - [Q4D0B9_TRYCC]	49	5.72	2		5	3	4		6	3
Q4CYE4	40S ribosomal protein S26 OS=Trypanosoma cruzi (strain CL Brener) OX=353153 GN=Tc00.1047053503801.20 PE=1 SV=1 - [Q4CYE4_TRYCC]	12.8	11.69	2		2		5		2
Q4D0K8	Kinesin-like protein (Fragment) OS=Trypanosoma cruzi (strain CL Brener) OX=353153 GN=Tc00.1047053508043.40 PE=3 SV=1 - [Q4D0K8_TRYCC]	72	8.62	2		2	3	2		2	4
Q4D5C6	Trans-sialidase, putative OS=Trypanosoma cruzi (strain CL Brener) OX=353153 GN=Tc00.1047053510239.80 PE=4 SV=1 - [Q4D5C6_TRYCC]	83.2	6.15	2		4	3	2		6	3
Q4DTA1	Ubiquinone biosynthesis O-methyltransferase, mitochondrial OS=Trypanosoma cruzi (strain CL Brener) OX=353153 GN=Tc00.1047053506147.60 PE=3 SV=1 - [Q4DTA1_TRYCC]	30.1	7.42	2		2	2	3		2	2
Q4E1K7	Uncharacterized protein OS=Trypanosoma cruzi (strain CL Brener) OX=353153 GN=Tc00.1047053508909.210 PE=4 SV=1 - [Q4E1K7_TRYCC]	59.7	10.39	2		2		3		2
Q4DQA0	Trans-sialidase, putative OS=Trypanosoma cruzi (strain CL Brener) OX=353153 GN=Tc00.1047053506757.120 PE=4 SV=1 - [Q4DQA0_TRYCC]	87.5	5.87	2		2	4	2		4	4
Q4D0T2	Trans-sialidase, putative OS=Trypanosoma cruzi (strain CL Brener) OX=353153 GN=Tc00.1047053510125.20 PE=4 SV=1 - [Q4D0T2_TRYCC]	113.6	4.88	2		5	6	4		8	10
Q4DX68	Uncharacterized protein OS=Trypanosoma cruzi (strain CL Brener) OX=353153 GN=Tc00.1047053506945.320 PE=4 SV=1 - [Q4DX68_TRYCC]	51.6	6.76	2		5	5	3		8	7
Q4DLR8	Acyl-CoA dehydrogenase, putative OS=Trypanosoma cruzi (strain CL Brener) OX=353153 GN=Tc00.1047053509153.120 PE=3 SV=1 - [Q4DLR8_TRYCC]	44	8.09	2		2		3		2
Q4CLP1	ATP-dependent Clp protease subunit, heat shock protein 100, putative (Fragment) OS=Trypanosoma cruzi (strain CL Brener) OX=353153 GN=Tc00.1047053508807.10 PE=4 SV=1 - [Q4CLP1_TRYCC]	28.8	6.29	2			2	2			2
Q4DJB5	Phosphoenolpyruvate mutase, putative OS=Trypanosoma cruzi (strain CL Brener) OX=353153 GN=Tc00.1047053508851.189 PE=4 SV=1 - [Q4DJB5_TRYCC]	33.1	6.79	2		4	3	3		4	6
Q4D8X3	ATP-dependent DEAD/H RNA helicase, putative OS=Trypanosoma cruzi (strain CL Brener) OX=353153 GN=Tc00.1047053506587.40 PE=3 SV=1 - [Q4D8X3_TRYCC]	44.9	6.8	2		2	2	2		2	2
Q4CKZ4	Trans-sialidase, putative (Fragment) OS=Trypanosoma cruzi (strain CL Brener) OX=353153 GN=Tc00.1047053483183.10 PE=4 SV=1 - [Q4CKZ4_TRYCC]	58	4.88	2		3	3	3		4	4
Q4CV38	Rab1 small GTP-binding protein, putative OS=Trypanosoma cruzi (strain CL Brener) OX=353153 GN=Tc00.1047053503689.4 PE=4 SV=1 - [Q4CV38_TRYCC]	24.6	8.44		4	2			4	2
Q4DD18	Protein kinase, putative (Fragment) OS=Trypanosoma cruzi (strain CL Brener) OX=353153 GN=Tc00.1047053511289.14 PE=3 SV=1 - [Q4DD18_TRYCC]	30.1	6.92		2	2			2	2
Q4DU39	Kinesin, putative OS=Trypanosoma cruzi (strain CL Brener) OX=353153 GN=Tc00.1047053506241.60 PE=3 SV=1 - [Q4DU39_TRYCC]	74.3	6.51		2	2			3	2
Q4E689	Dynamin, putative OS=Trypanosoma cruzi (strain CL Brener) OX=353153 GN=Tc00.1047053508153.20 PE=3 SV=1 - [Q4E689_TRYCC]	72.8	7.64		3	3	4		5	3	6
Q4DHP4	Kinesin-like protein OS=Trypanosoma cruzi (strain CL Brener) OX=353153 GN=Tc00.1047053511491.60 PE=3 SV=1 - [Q4DHP4_TRYCC]	70.7	7.05		2		2		2		2
Q4CRX2	Clathrin coat assembly protein, putative OS=Trypanosoma cruzi (strain CL Brener) OX=353153 GN=Tc00.1047053503449.30 PE=4 SV=1 - [Q4CRX2_TRYCC]	55.3	5.67		3	2			3	2
Q4E4S9	Protein kinase A catalytic subunit isoform 1, putative OS=Trypanosoma cruzi (strain CL Brener) OX=353153 GN=Tc00.1047053508461.310 PE=3 SV=1 - [Q4E4S9_TRYCC]	44.7	9.03		2		2		2		3
Q4D645	Trans-sialidase, putative OS=Trypanosoma cruzi (strain CL Brener) OX=353153 GN=Tc00.1047053509755.50 PE=4 SV=1 - [Q4D645_TRYCC]	97.3	5.94		2	2	3		3	2	3
Q4E650	Serine/threonine protein kinase, putative OS=Trypanosoma cruzi (strain CL Brener) OX=353153 GN=Tc00.1047053508153.400 PE=3 SV=1 - [Q4E650_TRYCC]	56.3	6.7		4	2			4	2
Q4DJS3	Trans-sialidase, putative OS=Trypanosoma cruzi (strain CL Brener) OX=353153 GN=Tc00.1047053510715.20 PE=4 SV=1 - [Q4DJS3_TRYCC]	98.9	5.82		2		2		3		3
Q4CVB9	Mitochondrial RNA binding protein, putative (Fragment) OS=Trypanosoma cruzi (strain CL Brener) OX=353153 GN=Tc00.1047053510509.50 PE=4 SV=1 - [Q4CVB9_TRYCC]	28	9.51		3	2			4	2
Q4DKY3	Uncharacterized protein OS=Trypanosoma cruzi (strain CL Brener) OX=353153 GN=Tc00.1047053506337.50 PE=4 SV=1 - [Q4DKY3_TRYCC]	23.3	9.25		2	2			2	3
Q4DTC3	Trans-sialidase, putative OS=Trypanosoma cruzi (strain CL Brener) OX=353153 GN=Tc00.1047053510025.50 PE=4 SV=1 - [Q4DTC3_TRYCC]	93.5	7.96		3	6	5		4	11	6
Q4DN34	Microtubule-associated protein Gb4, putative (Fragment) OS=Trypanosoma cruzi (strain CL Brener) OX=353153 GN=Tc00.1047053507615.19 PE=4 SV=1 - [Q4DN34_TRYCC]	189.8	5.19		4	3	2		4	3	2
Q4CPW7	Surface protease GP63, putative OS=Trypanosoma cruzi (strain CL Brener) OX=353153 GN=Tc00.1047053508611.30 PE=4 SV=1 - [Q4CPW7_TRYCC]	59.6	6.67		5		4		7		5
Q4DH72	Trans-sialidase, putative OS=Trypanosoma cruzi (strain CL Brener) OX=353153 GN=Tc00.1047053509527.120 PE=4 SV=1 - [Q4DH72_TRYCC]	97.7	5.31		3		2		4		2
Q4CVL0	dTDP-glucose 4,6-dehydratase, putative OS=Trypanosoma cruzi (strain CL Brener) OX=353153 GN=Tc00.1047053509051.30 PE=4 SV=1 - [Q4CVL0_TRYCC]	36.6	6.74		3		2		6		3
Q4DF74	Trans-sialidase, putative (Fragment) OS=Trypanosoma cruzi (strain CL Brener) OX=353153 GN=Tc00.1047053507687.10 PE=4 SV=1 - [Q4DF74_TRYCC]	51.5	7.12		4	2	2		6	5	2
Q4DBE7	Trans-sialidase, putative OS=Trypanosoma cruzi (strain CL Brener) OX=353153 GN=Tc00.1047053506615.150 PE=4 SV=1 - [Q4DBE7_TRYCC]	82.3	7.77		4	3	3		4	5	3
Q4E383	Trans-sialidase, putative OS=Trypanosoma cruzi (strain CL Brener) OX=353153 GN=Tc00.1047053510279.110 PE=4 SV=1 - [Q4E383_TRYCC]	100.9	5.15		3	2	3		3	3	4
Q4CRQ2	DNA-directed RNA polymerase II subunit 2, putative (Fragment) OS=Trypanosoma cruzi (strain CL Brener) OX=353153 GN=Tc00.1047053509951.49 PE=3 SV=1 - [Q4CRQ2_TRYCC]	69.8	6.74		4	2	2		6	3	2
Q4CW46	Seryl-tRNA synthetase, putative (Fragment) OS=Trypanosoma cruzi (strain CL Brener) OX=353153 GN=Tc00.1047053511163.10 PE=4 SV=1 - [Q4CW46_TRYCC]	25.7	5.67		2	2	2		3	2	2
Q4DWV4	Trans-sialidase, putative OS=Trypanosoma cruzi (strain CL Brener) OX=353153 GN=Tc00.1047053507875.70 PE=4 SV=1 - [Q4DWV4_TRYCC]	94.4	5.47		2	5	5		3	7	7
Q4DLK5	Prolyl-tRNA synthetase, putative OS=Trypanosoma cruzi (strain CL Brener) OX=353153 GN=Tc00.1047053503939.80 PE=3 SV=1 - [Q4DLK5_TRYCC]	91.3	8.15		3	7	5		3	10	6
Q4CPP3	Trans-sialidase, putative (Fragment) OS=Trypanosoma cruzi (strain CL Brener) OX=353153 GN=Tc00.1047053505317.9 PE=4 SV=1 - [Q4CPP3_TRYCC]	60.2	8.05		4	2	2		8	2	2
Q4DSS0	Uncharacterized protein OS=Trypanosoma cruzi (strain CL Brener) OX=353153 GN=Tc00.1047053507809.110 PE=4 SV=1 - [Q4DSS0_TRYCC]	145.4	6.68		4	2			5	2
Q4DWW2	Trans-sialidase, putative OS=Trypanosoma cruzi (strain CL Brener) OX=353153 GN=Tc00.1047053510729.280 PE=4 SV=1 - [Q4DWW2_TRYCC]	105.8	4.91		3	5	4		7	14	11
Q4DC68	Seryl-tRNA synthetase, putative OS=Trypanosoma cruzi (strain CL Brener) OX=353153 GN=Tc00.1047053506777.80 PE=4 SV=1 - [Q4DC68_TRYCC]	53.3	5.73		2	2	2		3	2	2
Q4DGV8	Trans-sialidase, putative OS=Trypanosoma cruzi (strain CL Brener) OX=353153 GN=Tc00.1047053506975.90 PE=4 SV=1 - [Q4DGV8_TRYCC]	112.5	5.01		4	5	6		5	7	7
Q4E426	Trans-sialidase, putative OS=Trypanosoma cruzi (strain CL Brener) OX=353153 GN=Tc00.1047053511173.440 PE=4 SV=1 - [Q4E426_TRYCC]	82.5	5.54		3	2			3	2
Q4CKF1	Dynein heavy chain, putative (Fragment) OS=Trypanosoma cruzi (strain CL Brener) OX=353153 GN=Tc00.1047053479379.9 PE=4 SV=1 - [Q4CKF1_TRYCC]	45.8	6.74		4		3		5		3
Q4CQU8	Trans-sialidase, putative (Fragment) OS=Trypanosoma cruzi (strain CL Brener) OX=353153 GN=Tc00.1047053470827.20 PE=4 SV=1 - [Q4CQU8_TRYCC]	46.2	8.51		3	2	3		5	3	4
Q4DYD0	Trans-sialidase, putative OS=Trypanosoma cruzi (strain CL Brener) OX=353153 GN=Tc00.1047053506683.110 PE=4 SV=1 - [Q4DYD0_TRYCC]	113.7	4.88		2	2	3		2	2	4
Q4E5U7	Trans-sialidase, putative OS=Trypanosoma cruzi (strain CL Brener) OX=353153 GN=Tc00.1047053508221.650 PE=4 SV=1 - [Q4E5U7_TRYCC]	105.7	6.05		2	2	5		2	4	5
Q4E4Z5	Trans-sialidase, putative OS=Trypanosoma cruzi (strain CL Brener) OX=353153 GN=Tc00.1047053511255.10 PE=4 SV=1 - [Q4E4Z5_TRYCC]	93.6	6.01		2		2		2		2
Q4D6X8	Glutamine-dependent carbamoyl-phosphate synthetase, putative (Fragment) OS=Trypanosoma cruzi (strain CL Brener) OX=353153 GN=Tc00.1047053511647.4 PE=3 SV=1 - [Q4D6X8_TRYCC]	94.4	5.83		2		2		3		2
Q4D4G5	Uncharacterized protein OS=Trypanosoma cruzi (strain CL Brener) OX=353153 GN=Tc00.1047053508443.60 PE=4 SV=1 - [Q4D4G5_TRYCC]	110.7	4.74		2	2	2		2	2	2
Q4CU10	Trans-sialidase, putative OS=Trypanosoma cruzi (strain CL Brener) OX=353153 GN=Tc00.1047053504007.20 PE=4 SV=1 - [Q4CU10_TRYCC]	93	5.17		3		2		4		2
Q4D6F8	Trans-sialidase, putative OS=Trypanosoma cruzi (strain CL Brener) OX=353153 GN=Tc00.1047053506951.80 PE=4 SV=1 - [Q4D6F8_TRYCC]	93.9	5.2		2		3		2		3
Q4CX43	Dihydrolipoamide dehydrogenase, putative OS=Trypanosoma cruzi (strain CL Brener) OX=353153 GN=Tc00.1047053508933.10 PE=4 SV=1 - [Q4CX43_TRYCC]	60.4	7.05		7	4	4		11	5	5
Q4D6N9	Ribosomal protein S19, putative OS=Trypanosoma cruzi (strain CL Brener) OX=353153 GN=Tc00.1047053504013.100 PE=4 SV=1 - [Q4D6N9_TRYCC]	18.8	10.76		2		2		4		3
Q4CW95	Trans-sialidase, putative OS=Trypanosoma cruzi (strain CL Brener) OX=353153 GN=Tc00.1047053511839.40 PE=4 SV=1 - [Q4CW95_TRYCC]	92.4	6.73		2		3		3		3
Q4DY87	Trans-sialidase, putative OS=Trypanosoma cruzi (strain CL Brener) OX=353153 GN=Tc00.1047053506813.190 PE=4 SV=1 - [Q4DY87_TRYCC]	100.5	5		2		2		2		2
Q4CZ96	Trans-sialidase, putative OS=Trypanosoma cruzi (strain CL Brener) OX=353153 GN=Tc00.1047053508581.10 PE=4 SV=1 - [Q4CZ96_TRYCC]	90.7	6.02		2	5	5		3	7	9
Q4E377	Trans-sialidase, putative OS=Trypanosoma cruzi (strain CL Brener) OX=353153 GN=Tc00.1047053510279.230 PE=4 SV=1 - [Q4E377_TRYCC]	103.7	4.75		2		3		2		3
Q4DBF1	Trans-sialidase, putative OS=Trypanosoma cruzi (strain CL Brener) OX=353153 GN=Tc00.1047053509765.50 PE=4 SV=1 - [Q4DBF1_TRYCC]	112.9	4.98		2	3	4		2	5	5
Q4D9Z8	Surface protease GP63, putative OS=Trypanosoma cruzi (strain CL Brener) OX=353153 GN=Tc00.1047053511281.50 PE=4 SV=1 - [Q4D9Z8_TRYCC]	59.2	5.62		3		2		6		4
Q4DJD0	Uncharacterized protein OS=Trypanosoma cruzi (strain CL Brener) OX=353153 GN=Tc00.1047053508851.50 PE=4 SV=1 - [Q4DJD0_TRYCC]	68.5	4.67		3	4	4		3	4	6
Q4D1B2	Trans-sialidase, putative OS=Trypanosoma cruzi (strain CL Brener) OX=353153 GN=Tc00.1047053504533.40 PE=4 SV=1 - [Q4D1B2_TRYCC]	97.8	5.85			3	4			4	6
Q4DS99	Uncharacterized protein OS=Trypanosoma cruzi (strain CL Brener) OX=353153 GN=Tc00.1047053507031.100 PE=4 SV=1 - [Q4DS99_TRYCC]	58.1	11.02			3	4			3	5
Q4DVB6	Trans-sialidase, putative OS=Trypanosoma cruzi (strain CL Brener) OX=353153 GN=Tc00.1047053508761.40 PE=4 SV=1 - [Q4DVB6_TRYCC]	96.5	5.31			3	4			5	6
Q4DIT6	Thiolase protein-like protein, putative OS=Trypanosoma cruzi (strain CL Brener) OX=353153 GN=Tc00.1047053511389.150 PE=3 SV=1 - [Q4DIT6_TRYCC]	48	8.65			4	2			4	3
Q4D292	Surface protease GP63, putative OS=Trypanosoma cruzi (strain CL Brener) OX=353153 GN=Tc00.1047053511117.50 PE=4 SV=1 - [Q4D292_TRYCC]	99.4	6.35			3	2			5	4
Q4E4W6	Trans-sialidase, putative OS=Trypanosoma cruzi (strain CL Brener) OX=353153 GN=Tc00.1047053511255.700 PE=4 SV=1 - [Q4E4W6_TRYCC]	90.4	5.85			3	2			6	2
Q4D184	2-oxoisovalerate dehydrogenase alpha subunit, putative OS=Trypanosoma cruzi (strain CL Brener) OX=353153 GN=Tc00.1047053506853.50 PE=4 SV=1 - [Q4D184_TRYCC]	48.9	7.85			2	2			2	2
Q4D1D2	Trans-sialidase, putative OS=Trypanosoma cruzi (strain CL Brener) OX=353153 GN=Tc00.1047053503533.30 PE=4 SV=1 - [Q4D1D2_TRYCC]	97.6	5.35			3	4			6	5
Q4DRZ7	Trans-sialidase, putative OS=Trypanosoma cruzi (strain CL Brener) OX=353153 GN=Tc00.1047053511487.90 PE=4 SV=1 - [Q4DRZ7_TRYCC]	82.9	6.9			4	5			8	6
Q4E4N6	Uncharacterized protein OS=Trypanosoma cruzi (strain CL Brener) OX=353153 GN=Tc00.1047053506925.110 PE=4 SV=1 - [Q4E4N6_TRYCC]	31.5	8.7			3	2			4	5
Q4DGT2	Trans-sialidase, putative OS=Trypanosoma cruzi (strain CL Brener) OX=353153 GN=Tc00.1047053509265.110 PE=4 SV=1 - [Q4DGT2_TRYCC]	185.2	6.74			5	5			6	6
Q4DIE5	Trans-sialidase, putative OS=Trypanosoma cruzi (strain CL Brener) OX=353153 GN=Tc00.1047053506965.170 PE=4 SV=1 - [Q4DIE5_TRYCC]	81.2	5.53			3	3			5	3
Q4DYI5	Dihydrolipoamide acetyltransferase, putative OS=Trypanosoma cruzi (strain CL Brener) OX=353153 GN=Tc00.1047053511367.70 PE=4 SV=1 - [Q4DYI5_TRYCC]	28.1	7.06			4	4			6	9
Q4CPQ2	Trans-sialidase, putative OS=Trypanosoma cruzi (strain CL Brener) OX=353153 GN=Tc00.1047053511835.10 PE=4 SV=1 - [Q4CPQ2_TRYCC]	110.5	5.15			6	5			7	8
Q4CMT2	Microtubule-associated protein, putative (Fragment) OS=Trypanosoma cruzi (strain CL Brener) OX=353153 GN=Tc00.1047053507447.19 PE=4 SV=1 - [Q4CMT2_TRYCC]	85.2	5.01			4	4			4	7
Q4CQY9	Trans-sialidase, putative OS=Trypanosoma cruzi (strain CL Brener) OX=353153 GN=Tc00.1047053472357.10 PE=4 SV=1 - [Q4CQY9_TRYCC]	88	7.62			3	5			5	6
Q4CMD6	ADP-ribosylation factor, putative (Fragment) OS=Trypanosoma cruzi (strain CL Brener) OX=353153 GN=Tc00.1047053419417.4 PE=3 SV=1 - [Q4CMD6_TRYCC]	18.4	6.55			2	2			2	2
Q4DZJ6	Uncharacterized protein OS=Trypanosoma cruzi (strain CL Brener) OX=353153 GN=Tc00.1047053508799.190 PE=4 SV=1 - [Q4DZJ6_TRYCC]	40.7	8.68			3	3			3	4
Q4E5X1	Trans-sialidase, putative OS=Trypanosoma cruzi (strain CL Brener) OX=353153 GN=Tc00.1047053508221.180 PE=4 SV=1 - [Q4E5X1_TRYCC]	93.6	5.15			2	2			4	2
Q4CRI1	3,2-trans-enoyl-CoA isomerase, mitochondrial, putative OS=Trypanosoma cruzi (strain CL Brener) OX=353153 GN=Tc00.1047053507107.40 PE=3 SV=1 - [Q4CRI1_TRYCC]	39.5	7.09			2	3			4	5
Q4D7N7	Trans-sialidase, putative OS=Trypanosoma cruzi (strain CL Brener) OX=353153 GN=Tc00.1047053503447.50 PE=4 SV=1 - [Q4D7N7_TRYCC]	95.2	6.98			4	5			4	5
Q4DQ07	Complement regulatory protein, putative OS=Trypanosoma cruzi (strain CL Brener) OX=353153 GN=Tc00.1047053509217.160 PE=4 SV=1 - [Q4DQ07_TRYCC]	113.7	5.05			3	4			4	5
Q4D1C7	Trans-sialidase, putative OS=Trypanosoma cruzi (strain CL Brener) OX=353153 GN=Tc00.1047053504261.20 PE=4 SV=1 - [Q4D1C7_TRYCC]	100.2	5.24			2	4			4	4
Q4CYS5	Trans-sialidase, putative OS=Trypanosoma cruzi (strain CL Brener) OX=353153 GN=Tc00.1047053509843.20 PE=4 SV=1 - [Q4CYS5_TRYCC]	95	6.11			3	2			3	3
Q4DFT5	Trans-sialidase, putative OS=Trypanosoma cruzi (strain CL Brener) OX=353153 GN=Tc00.1047053506129.50 PE=4 SV=1 - [Q4DFT5_TRYCC]	159.2	7.03			6	6			8	9
Q4CZT6	Small GTP-binding protein Rab11, putative OS=Trypanosoma cruzi (strain CL Brener) OX=353153 GN=Tc00.1047053506151.30 PE=4 SV=1 - [Q4CZT6_TRYCC]	23.8	8.13			2	2			2	2
Q4DW83	Uncharacterized protein OS=Trypanosoma cruzi (strain CL Brener) OX=353153 GN=Tc00.1047053506989.309 PE=4 SV=1 - [Q4DW83_TRYCC]	59.3	6.55			3	4			6	8
Q4DCG5	Trans-sialidase, putative OS=Trypanosoma cruzi (strain CL Brener) OX=353153 GN=Tc00.1047053507479.70 PE=4 SV=1 - [Q4DCG5_TRYCC]	101.5	6.34			6	6			7	7
Q4CWC8	Trans-sialidase, putative OS=Trypanosoma cruzi (strain CL Brener) OX=353153 GN=Tc00.1047053508853.20 PE=4 SV=1 - [Q4CWC8_TRYCC]	93.1	6.71			3	3			5	3
Q4CPM8	Surface protein TolT, putative OS=Trypanosoma cruzi (strain CL Brener) OX=353153 GN=Tc00.1047053510433.20 PE=4 SV=1 - [Q4CPM8_TRYCC]	32.3	7.62			3	2			4	4
Q4D6Y6	Trans-sialidase, putative OS=Trypanosoma cruzi (strain CL Brener) OX=353153 GN=Tc00.1047053506053.50 PE=4 SV=1 - [Q4D6Y6_TRYCC]	98.9	6.57			4	6			8	8
Q4D0U9	RNA helicase, putative OS=Trypanosoma cruzi (strain CL Brener) OX=353153 GN=Tc00.1047053508319.40 PE=4 SV=1 - [Q4D0U9_TRYCC]	49.3	7.08			4	3			5	3
Q4CLL1	Trans-sialidase, putative (Fragment) OS=Trypanosoma cruzi (strain CL Brener) OX=353153 GN=Tc00.1047053460111.10 PE=4 SV=1 - [Q4CLL1_TRYCC]	74.4	5.48			2	4			6	6
Q4DJK4	Trans-sialidase, putative OS=Trypanosoma cruzi (strain CL Brener) OX=353153 GN=Tc00.1047053506339.10 PE=4 SV=1 - [Q4DJK4_TRYCC]	96.7	5.6			3	2			3	2
Q4D0K9	Ubiquitin-activating enzyme E1, putative OS=Trypanosoma cruzi (strain CL Brener) OX=353153 GN=Tc00.1047053508043.30 PE=3 SV=1 - [Q4D0K9_TRYCC]	114.3	5.96			2	2			3	2
Q4D0C6	Surface protein TolT OS=Trypanosoma cruzi (strain CL Brener) OX=353153 GN=Tc00.1047053506617.20 PE=4 SV=1 - [Q4D0C6_TRYCC]	33	8.43			3	3			5	4
Q4CNM5	ATP-dependent Clp protease subunit, heat shock protein 100 (HSP100), putative (Fragment) OS=Trypanosoma cruzi (strain CL Brener) OX=353153 GN=Tc00.1047053508665.14 PE=4 SV=1 - [Q4CNM5_TRYCC]	67.5	7.84			3	5			3	5
Q4DR40	Uncharacterized protein OS=Trypanosoma cruzi (strain CL Brener) OX=353153 GN=Tc00.1047053504109.80 PE=4 SV=1 - [Q4DR40_TRYCC]	153.3	7.42			2	2			4	2

## Sheet: Shared 
				TRYPOMASTIGOTE PEPTIDES				EPIMASTIGOTE PEPTIDES			TRYPOMASTIGOTE PSM				EPIMASTIGOTE PSM
Accession	Description	MW [kDa]	calc. pI	# Peptides Sample 1	# Peptides Sample 2	# Peptides Sample 3	# Peptides Sample 4	# Peptides Sample 1	# Peptides Sample 2	# Peptides Sample 3	# PSM Sample 1	# PSM Sample 2	# PSM Sample 3	# PSM Sample 4	# PSM Sample 1	# PSM Sample 2	# PSM Sample 3
Q4CQS6	Heat shock protein 85, putative OS=Trypanosoma cruzi (strain CL Brener) OX=353153 GN=Tc00.1047053507713.30 PE=3 SV=1 - [Q4CQS6_TRYCC]	80.7	5.15	27	32	30	34	53	85	62	79	16	25	25	26	41	43
Q4DI67	Heat shock protein, putative OS=Trypanosoma cruzi (strain CL Brener) OX=353153 GN=Tc00.1047053507831.60 PE=3 SV=1 - [Q4DI67_TRYCC]	93.5	5.36	27	29	28	28	43	53	45	46	5	10	12	5	13	13
Q4E0Q0	Pyruvate, phosphate dikinase OS=Trypanosoma cruzi (strain CL Brener) OX=353153 GN=Tc00.1047053506297.190 PE=3 SV=1 - [Q4E0Q0_TRYCC]	100.8	8.16	21	23	32	26	31	32	55	52	10	34	30	10	52	50
Q4DB81	Glycosomal phosphoenolpyruvate carboxykinase, putative OS=Trypanosoma cruzi (strain CL Brener) OX=353153 GN=Tc00.1047053508441.20 PE=3 SV=1 - [Q4DB81_TRYCC]	58.8	8.48	20	27	26	28	33	60	53	50	7	15	18	13	26	29
Q4DYQ9	Uncharacterized protein OS=Trypanosoma cruzi (strain CL Brener) OX=353153 GN=Tc00.1047053507641.160 PE=4 SV=1 - [Q4DYQ9_TRYCC]	96.6	6.32	20	11	23	23	33	16	32	33	8	5	5	11	7	5
Q4D5C2	Glutamate dehydrogenase OS=Trypanosoma cruzi (strain CL Brener) OX=353153 GN=Tc00.1047053508111.30 PE=3 SV=1 - [Q4D5C2_TRYCC]	45	7.93	19	16	15	17	41	53	37	46	16	19	20	34	63	72
Q4CUM2	Major vault protein OS=Trypanosoma cruzi (strain CL Brener) OX=353153 GN=Tc00.1047053510353.10 PE=3 SV=1 - [MVP_TRYCC]	94.5	6.93	18	11	18	18	28	19	35	33	11	8	7	22	8	7
Q4DJS7	Cytoskeleton-associated protein CAP5.5, putative OS=Trypanosoma cruzi (strain CL Brener) OX=353153 GN=Tc00.1047053509237.130 PE=3 SV=1 - [Q4DJS7_TRYCC]	88.6	4.97	18	18	17	13	24	31	26	20	12	15	15	18	19	24
Q4D673	Heat shock protein, putative (Fragment) OS=Trypanosoma cruzi (strain CL Brener) OX=353153 GN=Tc00.1047053511263.9 PE=3 SV=1 - [Q4D673_TRYCC]	65.5	6.57	17	21	18	20	30	41	31	31	5	8	7	5	12	8
Q4CMU8	NADH-dependent fumarate reductase, putative OS=Trypanosoma cruzi (strain CL Brener) OX=353153 GN=Tc00.1047053510215.10 PE=4 SV=1 - [Q4CMU8_TRYCC]	124.7	8.66	17	16	9	16	18	24	12	17	0	8	7	0	9	7
Q4D634	Paraflagellar rod protein 3, putative OS=Trypanosoma cruzi (strain CL Brener) OX=353153 GN=Tc00.1047053509617.20 PE=4 SV=1 - [Q4D634_TRYCC]	68.6	6.09	17	18	16	17	26	31	21	23	0	4	4	0	4	5
Q4DIF6	69 kDa paraflagellar rod protein, putative OS=Trypanosoma cruzi (strain CL Brener) OX=353153 GN=Tc00.1047053511215.119 PE=4 SV=1 - [Q4DIF6_TRYCC]	69.5	6.18	15	17	15	16	23	30	21	22	0	2	2	0	2	2
Q4DWV8	Glutamate dehydrogenase OS=Trypanosoma cruzi (strain CL Brener) OX=353153 GN=Tc00.1047053507875.20 PE=3 SV=1 - [Q4DWV8_TRYCC]	45.2	8.28	14	11	10	13	26	30	20	27	12	16	15	23	37	37
Q4DQP2	Tubulin beta chain OS=Trypanosoma cruzi (strain CL Brener) OX=353153 GN=Tc00.1047053506563.40 PE=3 SV=1 - [Q4DQP2_TRYCC]	49.7	4.81	13	16	17	17	45	58	78	83	12	16	17	25	56	64
Q4CLA1	Tubulin alpha chain OS=Trypanosoma cruzi (strain CL Brener) OX=353153 GN=Tc00.1047053411235.9 PE=3 SV=1 - [Q4CLA1_TRYCC]	49.8	5.06	13	17	19	17	51	98	54	66	10	15	14	24	36	31
Q4CRB1	Major vault protein, putative (Fragment) OS=Trypanosoma cruzi (strain CL Brener) OX=353153 GN=Tc00.1047053509541.19 PE=4 SV=1 - [Q4CRB1_TRYCC]	69.3	6.98	13	7	10	10	23	12	19	19	9	4	5	17	4	5
Q4D609	Cytoskeleton-associated protein CAP5.5, putative OS=Trypanosoma cruzi (strain CL Brener) OX=353153 GN=Tc00.1047053508555.60 PE=3 SV=1 - [Q4D609_TRYCC]	89.8	5.01	13	14	12	10	18	25	21	18	11	12	11	17	18	20
Q4D3P0	Uncharacterized protein OS=Trypanosoma cruzi (strain CL Brener) OX=353153 GN=Tc00.1047053508951.70 PE=4 SV=1 - [Q4D3P0_TRYCC]	95.8	5.8	13	12	20	18	17	15	30	22	10	5	9	13	6	12
Q4DQ27	Phosphotransferase OS=Trypanosoma cruzi (strain CL Brener) OX=353153 GN=Tc00.1047053510121.20 PE=3 SV=1 - [Q4DQ27_TRYCC]	52.2	8.44	11	17	14	14	18	35	30	33	10	16	16	20	37	37
Q4CU95	Heat shock 70 kDa protein, putative (Fragment) OS=Trypanosoma cruzi (strain CL Brener) OX=353153 GN=Tc00.1047053510439.61 PE=3 SV=1 - [Q4CU95_TRYCC]	40.8	6.61	11	18	22	20	15	36	40	51	11	19	17	22	35	28
Q4CTC8	Uncharacterized protein OS=Trypanosoma cruzi (strain CL Brener) OX=353153 GN=Tc00.1047053507569.10 PE=4 SV=1 - [Q4CTC8_TRYCC]	93	4.93	11	13	11	9	14	22	15	14	6	10	12	10	13	19
Q4E2Q2	Heat shock protein, putative OS=Trypanosoma cruzi (strain CL Brener) OX=353153 GN=Tc00.1047053504153.310 PE=3 SV=1 - [Q4E2Q2_TRYCC]	83.9	6.57	11	9	11	8	17	16	17	17	2	5	4	2	5	6
Q4CYL3	Uncharacterized protein OS=Trypanosoma cruzi (strain CL Brener) OX=353153 GN=Tc00.1047053504423.30 PE=4 SV=1 - [Q4CYL3_TRYCC]	93.7	4.92	11	13	10	10	14	23	14	15	5	10	13	9	13	20
Q4DZJ3	Aminopeptidase, putative OS=Trypanosoma cruzi (strain CL Brener) OX=353153 GN=Tc00.1047053508799.240 PE=4 SV=1 - [Q4DZJ3_TRYCC]	55.9	6.47	11	9	11	8	11	11	20	10	4	12	12	6	23	26
Q4DQ22	Uncharacterized protein OS=Trypanosoma cruzi (strain CL Brener) OX=353153 GN=Tc00.1047053510121.70 PE=4 SV=1 - [Q4DQ22_TRYCC]	96.5	5.82	11	11	17	15	14	14	25	17	9	4	8	11	4	8
Q4DZ98	Enolase, putative OS=Trypanosoma cruzi (strain CL Brener) OX=353153 GN=Tc00.1047053504105.140 PE=1 SV=1 - [Q4DZ98_TRYCC]	46.4	6.28	11	12	14	11	14	20	23	19	9	14	14	15	24	27
Q4DTM9	Heat shock protein 70 (HSP70), putative OS=Trypanosoma cruzi (strain CL Brener) OX=353153 GN=Tc00.1047053511211.160 PE=3 SV=1 - [Q4DTM9_TRYCC]	70.9	6.06	11	19	21	21	15	35	40	54	12	17	15	23	33	24
Q4D9G6	Threonyl-tRNA synthetase, putative OS=Trypanosoma cruzi (strain CL Brener) OX=353153 GN=Tc00.1047053508299.80 PE=3 SV=1 - [Q4D9G6_TRYCC]	92.6	6.83	11	12	16	14	17	14	20	18	0	8	6	0	9	7
Q4DWB5	Transitional endoplasmic reticulum ATPase, putative OS=Trypanosoma cruzi (strain CL Brener) OX=353153 GN=Tc00.1047053509733.170 PE=4 SV=1 - [Q4DWB5_TRYCC]	86.1	5.58	11	9	20	20	15	9	33	33	0	18	19	0	29	30
Q4DCN9	Glyceraldehyde-3-phosphate dehydrogenase OS=Trypanosoma cruzi (strain CL Brener) OX=353153 GN=Tc00.1047053506943.50 PE=3 SV=1 - [Q4DCN9_TRYCC]	39	8.87	10	13	14	15	13	19	32	30	2	8	7	2	13	10
Q4DYP5	Chaperonin HSP60, mitochondrial OS=Trypanosoma cruzi (strain CL Brener) OX=353153 GN=Tc00.1047053507641.290 PE=3 SV=1 - [Q4DYP5_TRYCC]	59.1	5.5	10	16	30	29	13	25	75	73	7	22	23	12	43	45
Q4DTX7	ATP synthase subunit beta OS=Trypanosoma cruzi (strain CL Brener) OX=353153 GN=Tc00.1047053509233.180 PE=3 SV=1 - [Q4DTX7_TRYCC]	55.7	5.43	10	13	16	12	18	24	27	21	8	7	6	10	10	9
Q4E5Z1	Uncharacterized protein OS=Trypanosoma cruzi (strain CL Brener) OX=353153 GN=Tc00.1047053508153.1050 PE=4 SV=1 - [Q4E5Z1_TRYCC]	246.3	6.2	10	5			12	7			0	6	7	0	7	7
Q4DK44	Acyl-CoA dehydrogenase, putative OS=Trypanosoma cruzi (strain CL Brener) OX=353153 GN=Tc00.1047053508827.40 PE=3 SV=1 - [Q4DK44_TRYCC]	68.6	8.03	10	11	12	10	14	14	17	13	0	3	3	0	3	4
Q4D778	NADH-dependent fumarate reductase, putative (Fragment) OS=Trypanosoma cruzi (strain CL Brener) OX=353153 GN=Tc00.1047053503849.80 PE=4 SV=1 - [Q4D778_TRYCC]	53	8.46	10	6	5	8	10	7	7	8	0	5	3	0	5	3
Q4CRF6	Elongation factor 1-alpha OS=Trypanosoma cruzi (strain CL Brener) OX=353153 GN=Tc00.1047053511367.370 PE=3 SV=1 - [Q4CRF6_TRYCC]	49.1	8.76	9	14	9	13	11	24	14	18	9	12	10	13	23	24
Q4D5P4	40S ribosomal protein S4 OS=Trypanosoma cruzi (strain CL Brener) OX=353153 GN=Tc00.1047053509683.117 PE=1 SV=1 - [Q4D5P4_TRYCC]	30.9	10.39	9	12	14	14	12	23	25	22	6	11	12	8	14	16
Q4D4R9	Fructose-bisphosphate aldolase OS=Trypanosoma cruzi (strain CL Brener) OX=353153 GN=Tc00.1047053504163.50 PE=3 SV=1 - [Q4D4R9_TRYCC]	40.8	8.6	9	10	9	9	11	17	15	16	5	10	9	6	13	17
Q4E342	Proteasome regulatory non-ATPase subunit 6, putative OS=Trypanosoma cruzi (strain CL Brener) OX=353153 GN=Tc00.1047053508741.300 PE=4 SV=1 - [Q4E342_TRYCC]	59.2	6.93	9	8	11	11	11	9	15	15	2	2	2	2	2	3
Q4CPR5	Proteasome activator protein PA26, putative OS=Trypanosoma cruzi (strain CL Brener) OX=353153 GN=Tc00.1047053511465.10 PE=4 SV=1 - [Q4CPR5_TRYCC]	25.6	6.79	9	9	9	9	16	15	9	9	2	9	12	2	11	14
Q4DJX1	Ribosomal protein L3, putative OS=Trypanosoma cruzi (strain CL Brener) OX=353153 GN=Tc00.1047053510879.110 PE=3 SV=1 - [Q4DJX1_TRYCC]	48.5	11.09	9	5	5	5	13	7	6	7	0	7	5	0	10	10
Q4E5G5	Aconitate hydratase OS=Trypanosoma cruzi (strain CL Brener) OX=353153 GN=Tc00.1047053511277.290 PE=3 SV=1 - [Q4E5G5_TRYCC]	98.6	6.9	9	9	12	11	13	10	15	13	0	8	11	0	11	19
Q4DPR0	Threonyl-tRNA synthetase, putative OS=Trypanosoma cruzi (strain CL Brener) OX=353153 GN=Tc00.1047053511181.80 PE=3 SV=1 - [Q4DPR0_TRYCC]	92.7	6.77	9	11	14	11	14	13	17	15	0	5	3	0	6	4
Q4D112	Pyrroline-5-carboxylate synthetase-like protein, putative (Fragment) OS=Trypanosoma cruzi (strain CL Brener) OX=353153 GN=Tc00.1047053509067.70 PE=3 SV=1 - [Q4D112_TRYCC]	48.7	6.23	9	7	5	6	11	8	7	7	0	4	4	0	4	4
Q4DXC0	Proteasome regulatory non-ATPase subunit 2, putative OS=Trypanosoma cruzi (strain CL Brener) OX=353153 GN=Tc00.1047053510901.150 PE=4 SV=1 - [Q4DXC0_TRYCC]	105.6	5.64	9	6	9	9	11	7	15	12	0	4	4	0	4	8
Q4CV82	Coatomer subunit beta' OS=Trypanosoma cruzi (strain CL Brener) OX=353153 GN=Tc00.1047053506815.30 PE=3 SV=1 - [Q4CV82_TRYCC]	99.9	5.14	9	5	7	5	11	6	8	5	0	2	2	0	2	2
Q4DAM1	Coatomer subunit beta' OS=Trypanosoma cruzi (strain CL Brener) OX=353153 GN=Tc00.1047053507105.10 PE=3 SV=1 - [Q4DAM1_TRYCC]	98	5.15	9	5	6	5	11	6	7	5	0	2	2	0	2	2
Q4DD37	Chaperonin alpha subunit, putative OS=Trypanosoma cruzi (strain CL Brener) OX=353153 GN=Tc00.1047053511025.70 PE=3 SV=1 - [Q4DD37_TRYCC]	59.3	6.16	9	6	8	10	10	8	10	12	0	3	4	0	3	5
Q4D5X3	Proteasome subunit alpha type OS=Trypanosoma cruzi (strain CL Brener) OX=353153 GN=Tc00.1047053506167.40 PE=3 SV=1 - [Q4D5X3_TRYCC]	29.3	5.66	8	10	11	11	11	21	21	20	6	12	12	8	31	29
Q4CUL0	40S ribosomal protein S3, putative OS=Trypanosoma cruzi (strain CL Brener) OX=353153 GN=Tc00.1047053430605.29 PE=4 SV=1 - [Q4CUL0_TRYCC]	24.1	9.88	8	8	7	5	14	16	10	9	3	4	3	4	5	5
Q4E4G8	Proteasome subunit alpha type OS=Trypanosoma cruzi (strain CL Brener) OX=353153 GN=Tc00.1047053506885.350 PE=3 SV=1 - [Q4E4G8_TRYCC]	27.5	6.98	8	11	10	10	16	19	24	16	3	11	12	4	23	23
Q4DWX8	Proteasome subunit alpha type OS=Trypanosoma cruzi (strain CL Brener) OX=353153 GN=Tc00.1047053510729.70 PE=3 SV=1 - [Q4DWX8_TRYCC]	27.5	7.05	8	11	10	10	17	19	24	16	4	11	12	5	23	22
Q4CVR9	Heat shock 70 kDa protein, mitochondrial, putative OS=Trypanosoma cruzi (strain CL Brener) OX=353153 GN=Tc00.1047053507029.30 PE=3 SV=1 - [Q4CVR9_TRYCC]	70.9	5.97	8	14	21	22	10	23	38	34	10	20	21	14	35	39
Q4D3T1	Elongation factor 2, putative OS=Trypanosoma cruzi (strain CL Brener) OX=353153 GN=Tc00.1047053510963.90 PE=4 SV=1 - [Q4D3T1_TRYCC]	94.1	6.04	8	15	14	15	11	22	19	18	5	18	19	8	25	30
Q4E0B2	Glucose-6-phosphate 1-dehydrogenase OS=Trypanosoma cruzi (strain CL Brener) OX=353153 GN=Tc00.1047053509287.50 PE=1 SV=1 - [Q4E0B2_TRYCC]	62.9	7.21	8	11	8	5	9	12	10	6	0	5	5	0	5	5
Q4DTH5	ATP-dependent Clp protease subunit, heat shock protein 78, putative OS=Trypanosoma cruzi (strain CL Brener) OX=353153 GN=Tc00.1047053508737.100 PE=4 SV=1 - [Q4DTH5_TRYCC]	90	7.61	8	5	18	17	13	7	24	22	0	2	2	0	4	3
Q4CZX4	V-type ATPase, A subunit, putative OS=Trypanosoma cruzi (strain CL Brener) OX=353153 GN=Tc00.1047053503929.10 PE=3 SV=1 - [Q4CZX4_TRYCC]	67.9	5.82	8	8	2	5	9	16	3	10	0	8	10	0	11	15
Q4DBY0	Proteasome regulatory non-ATPase subunit 5, putative OS=Trypanosoma cruzi (strain CL Brener) OX=353153 GN=Tc00.1047053506977.90 PE=4 SV=1 - [Q4DBY0_TRYCC]	54.8	6.84	8	6	8	10	8	7	10	11	0	2	2	0	2	2
Q4DKY2	2-oxoglutarate dehydrogenase E1 component, putative OS=Trypanosoma cruzi (strain CL Brener) OX=353153 GN=Tc00.1047053506337.70 PE=4 SV=1 - [Q4DKY2_TRYCC]	112.3	6.65	8	5	16	13	11	9	22	18	0	6	6	0	8	6
Q4D832	Heat shock protein DnaJ, putative OS=Trypanosoma cruzi (strain CL Brener) OX=353153 GN=Tc00.1047053511627.110 PE=3 SV=1 - [Q4D832_TRYCC]	44.2	7.4	8	3		3	8	3		6	0	4	5	0	4	7
Q4CYK5	Proteasome subunit alpha type OS=Trypanosoma cruzi (strain CL Brener) OX=353153 GN=Tc00.1047053503613.20 PE=3 SV=1 - [Q4CYK5_TRYCC]	28	6.8	7	14	13	13	9	28	18	21	2	17	16	3	25	26
Q4DJB6	14-3-3 protein, putative OS=Trypanosoma cruzi (strain CL Brener) OX=353153 GN=Tc00.1047053508851.180 PE=3 SV=1 - [Q4DJB6_TRYCC]	29.9	5.06	7	8	6	4	9	11	6	5	3	7	8	4	9	9
Q4E4V0	Polyadenylate-binding protein OS=Trypanosoma cruzi (strain CL Brener) OX=353153 GN=Tc00.1047053508461.140 PE=3 SV=1 - [Q4E4V0_TRYCC]	61.4	9.25	7	11	14	10	9	14	15	11	2	9	10	2	15	12
Q4CT37	2-amino-3-ketobutyrate coenzyme A ligase, putative OS=Trypanosoma cruzi (strain CL Brener) OX=353153 GN=Tc00.1047053511899.40 PE=3 SV=1 - [Q4CT37_TRYCC]	43.6	7.18	7	3	5	5	7	6	7	8	5	6	9	12	16	17
Q4CZR0	Small GTP-binding protein Rab1, putative OS=Trypanosoma cruzi (strain CL Brener) OX=353153 GN=Tc00.1047053503715.30 PE=4 SV=1 - [Q4CZR0_TRYCC]	22.8	7.77	7	6	5	4	9	8	5	5	3	5	4	5	6	5
Q4D9S6	Urocanate hydratase, putative OS=Trypanosoma cruzi (strain CL Brener) OX=353153 GN=Tc00.1047053504045.110 PE=3 SV=1 - [Q4D9S6_TRYCC]	74.7	6.77	7	4	5	4	8	6	5	5	6	17	17	10	28	27
Q4DRT8	Delta-1-pyrroline-5-carboxylate dehydrogenase, putative OS=Trypanosoma cruzi (strain CL Brener) OX=353153 GN=Tc00.1047053510943.50 PE=3 SV=1 - [Q4DRT8_TRYCC]	62.4	7.87	7	11	7	9	7	16	8	14	4	13	14	6	21	22
Q4DAW6	Proteasome subunit alpha type OS=Trypanosoma cruzi (strain CL Brener) OX=353153 GN=Tc00.1047053504069.10 PE=3 SV=1 - [Q4DAW6_TRYCC]	25	6.11	7	7	7	6	13	23	18	19	5	9	9	9	25	25
Q4E657	ATP-dependent 6-phosphofructokinase OS=Trypanosoma cruzi (strain CL Brener) OX=353153 GN=pfk PE=1 SV=1 - [PFKA_TRYCC]	53.5	9	7	6	5	7	8	6	5	7	0	3	2	0	3	2
Q4D0L7	Heat shock protein, putative (Fragment) OS=Trypanosoma cruzi (strain CL Brener) OX=353153 GN=Tc00.1047053506301.11 PE=4 SV=1 - [Q4D0L7_TRYCC]	37.8	5.44	7	6	4	6	9	8	4	8	0	3	3	0	3	6
Q4DSU0	40S ribosomal protein S6 OS=Trypanosoma cruzi (strain CL Brener) OX=353153 GN=Tc00.1047053510769.49 PE=1 SV=1 - [Q4DSU0_TRYCC]	28.3	11.43	7	4	4	5	10	6	5	7	0	7	6	0	12	8
Q4CTE8	2-oxoglutarate dehydrogenase E1 component, putative OS=Trypanosoma cruzi (strain CL Brener) OX=353153 GN=Tc00.1047053510717.30 PE=4 SV=1 - [Q4CTE8_TRYCC]	112.2	6.54	7	4	13	11	9	7	16	15	0	4	5	0	5	6
Q4DZT8	Acetyltransferase component of pyruvate dehydrogenase complex OS=Trypanosoma cruzi (strain CL Brener) OX=353153 GN=Tc00.1047053510105.170 PE=3 SV=1 - [Q4DZT8_TRYCC]	49.7	6.71	7	5	11	10	14	9	15	14	0	3	3	0	4	5
Q4E246	Uncharacterized protein OS=Trypanosoma cruzi (strain CL Brener) OX=353153 GN=Tc00.1047053508707.310 PE=4 SV=1 - [Q4E246_TRYCC]	101.8	4.69	7	6	10	7	10	8	13	11	0	3	3	0	4	3
Q4DIE1	ATP-dependent DEAD/H RNA helicase, putative OS=Trypanosoma cruzi (strain CL Brener) OX=353153 GN=Tc00.1047053506959.30 PE=3 SV=1 - [Q4DIE1_TRYCC]	46.7	7.52	7	11	8	5	7	19	9	6	0	3	4	0	3	5
Q4DD33	Dihydrolipoyl dehydrogenase OS=Trypanosoma cruzi (strain CL Brener) OX=353153 GN=Tc00.1047053511025.110 PE=3 SV=1 - [Q4DD33_TRYCC]	50.6	7.42	7		3	2	11		3	3	0	4	5	0	6	7
Q4E162	Probable eukaryotic initiation factor 4A OS=Trypanosoma cruzi (strain CL Brener) OX=353153 GN=Tc00.1047053511585.190 PE=3 SV=1 - [IF4A_TRYCC]	45.5	6.42	6	8	7	8	7	10	10	8	4	4	6	5	5	7
Q4E093	40S ribosomal protein S18, putative OS=Trypanosoma cruzi (strain CL Brener) OX=353153 GN=Tc00.1047053506679.100 PE=1 SV=1 - [Q4E093_TRYCC]	17.5	10.76	6	9	8	7	9	12	12	10	3	5	5	6	5	5
Q4D9Z4	Pyruvate kinase OS=Trypanosoma cruzi (strain CL Brener) OX=353153 GN=Tc00.1047053511281.60 PE=1 SV=1 - [Q4D9Z4_TRYCC]	54.6	7.4	6	6	8	7	9	8	11	8	2	9	8	4	11	9
Q4CQ52	Plasma membrane ATPase (Fragment) OS=Trypanosoma cruzi (strain CL Brener) OX=353153 GN=Tc00.1047053505763.19 PE=3 SV=1 - [Q4CQ52_TRYCC]	70.8	5.47	6	13	6	5	6	17	6	5	13	10	10	19	10	10
Q4E4L7	Isocitrate dehydrogenase [NADP] OS=Trypanosoma cruzi (strain CL Brener) OX=353153 GN=Tc00.1047053506925.319 PE=3 SV=1 - [Q4E4L7_TRYCC]	46.8	7.81	6	9	4	7	6	14	9	10	3	6	4	4	11	8
Q4CM56	Tryparedoxin peroxidase, putative OS=Trypanosoma cruzi (strain CL Brener) OX=353153 GN=Tc00.1047053507259.10 PE=4 SV=1 - [Q4CM56_TRYCC]	22.4	6.76	6	7	8	6	11	18	13	12	4	7	8	8	16	17
Q4CNR6	ATP synthase, alpha chain, mitochondrial, putative (Fragment) OS=Trypanosoma cruzi (strain CL Brener) OX=353153 GN=Tc00.1047053510395.10 PE=4 SV=1 - [Q4CNR6_TRYCC]	25.8	10.11	6	6	5	4	7	7	7	4	2	6	3	3	7	3
Q4DTV8	Uncharacterized protein OS=Trypanosoma cruzi (strain CL Brener) OX=353153 GN=Tc00.1047053508693.50 PE=4 SV=1 - [Q4DTV8_TRYCC]	43.1	6.42	6	10	6	9	9	15	7	10	3	6	7	3	6	7
Q4CXB4	ATPase alpha subunit, putative (Fragment) OS=Trypanosoma cruzi (strain CL Brener) OX=353153 GN=Tc00.1047053503617.40 PE=4 SV=1 - [Q4CXB4_TRYCC]	24.4	9.36	6	6	5	4	10	12	8	9	5	3	4	10	5	5
Q4D144	Proteasome subunit alpha type OS=Trypanosoma cruzi (strain CL Brener) OX=353153 GN=Tc00.1047053506985.30 PE=3 SV=1 - [Q4D144_TRYCC]	31.9	6.05	6	8	7	6	8	12	11	10	3	9	8	3	11	11
Q4D1R9	2-oxoglutarate dehydrogenase, E2 component, dihydrolipoamide succinyltransferase, putative OS=Trypanosoma cruzi (strain CL Brener) OX=353153 GN=Tc00.1047053506025.60 PE=4 SV=1 - [Q4D1R9_TRYCC]	44	9.07	6	4	12	9	8	5	22	21	5	8	8	6	12	14
Q4D1H4	Proteasome subunit alpha type OS=Trypanosoma cruzi (strain CL Brener) OX=353153 GN=Tc00.1047053511145.43 PE=3 SV=1 - [Q4D1H4_TRYCC]	27.1	5.01	6	10	8	9	8	18	16	18	5	9	9	6	22	22
Q4DD50	60S ribosomal protein L10, putative OS=Trypanosoma cruzi (strain CL Brener) OX=353153 GN=Tc00.1047053510241.50 PE=4 SV=1 - [Q4DD50_TRYCC]	24.7	10.7	6	4	3	3	10	8	5	4	0	4	6	0	7	8
Q4CVX9	60S ribosomal protein L9, putative OS=Trypanosoma cruzi (strain CL Brener) OX=353153 GN=Tc00.1047053509695.170 PE=4 SV=1 - [Q4CVX9_TRYCC]	21.9	9.95	6	7	7	3	8	11	9	3	0	6	7	0	7	8
Q4D9Z1	Proteasome regulatory non-ATPase subunit, putative OS=Trypanosoma cruzi (strain CL Brener) OX=353153 GN=Tc00.1047053511365.70 PE=4 SV=1 - [Q4D9Z1_TRYCC]	45.5	5.71	6	4	12	11	11	6	19	15	0	4	6	0	5	10
Q4CQU6	NADH-dependent fumarate reductase, putative (Fragment) OS=Trypanosoma cruzi (strain CL Brener) OX=353153 GN=Tc00.1047053503467.9 PE=4 SV=1 - [Q4CQU6_TRYCC]	64.2	8.56	6	8	3	7	6	12	3	7	0	2	2	0	2	2
Q4E673	Aspartyl aminopeptidase, putative OS=Trypanosoma cruzi (strain CL Brener) OX=353153 GN=Tc00.1047053508153.180 PE=3 SV=1 - [Q4E673_TRYCC]	49.5	6.58	6	9	6	7	8	16	10	13	0	4	5	0	6	7
Q4CKX1	Enoyl-CoA hydratase, mitochondrial, putative OS=Trypanosoma cruzi (strain CL Brener) OX=353153 GN=Tc00.1047053508185.10 PE=3 SV=1 - [Q4CKX1_TRYCC]	28.8	8.63	6	5			7	7			0	2	4	0	2	4
Q4DZM5	Proteasome regulatory ATPase subunit, putative OS=Trypanosoma cruzi (strain CL Brener) OX=353153 GN=Tc00.1047053504147.200 PE=3 SV=1 - [Q4DZM5_TRYCC]	45.4	8.65	6	6	8	5	8	11	9	6	0	5	2	0	6	2
Q4D779	NADH-dependent fumarate reductase, putative OS=Trypanosoma cruzi (strain CL Brener) OX=353153 GN=Tc00.1047053503849.60 PE=4 SV=1 - [Q4D779_TRYCC]	85.4	6.62	6	3	5	6	6	6	5	6	0	9	8	0	9	8
Q4DIZ9	40S ribosomal protein S2, putative OS=Trypanosoma cruzi (strain CL Brener) OX=353153 GN=Tc00.1047053503833.40 PE=1 SV=1 - [Q4DIZ9_TRYCC]	28.5	9.79	5	4	7	8	7	5	15	13	2	4	5	2	9	11
Q4E1U3	Pyruvate kinase OS=Trypanosoma cruzi (strain CL Brener) OX=353153 GN=Tc00.1047053507993.390 PE=3 SV=1 - [Q4E1U3_TRYCC]	54.6	7.39	5	6	8	7	8	8	11	8	2	8	7	4	10	8
Q4DND1	Proteasome subunit beta type OS=Trypanosoma cruzi (strain CL Brener) OX=353153 GN=Tc00.1047053507521.50 PE=3 SV=1 - [Q4DND1_TRYCC]	27.8	6.64	5	6	6	5	5	9	7	8	4	7	6	7	12	14
Q4D620	Glucose-regulated protein 78, putative OS=Trypanosoma cruzi (strain CL Brener) OX=353153 GN=Tc00.1047053506585.40 PE=3 SV=1 - [Q4D620_TRYCC]	71.3	5.2	5	8	19	22	5	9	32	33	3	15	16	3	24	21
Q4CWA5	Arginine kinase, putative OS=Trypanosoma cruzi (strain CL Brener) OX=353153 GN=Tc00.1047053507241.30 PE=3 SV=1 - [Q4CWA5_TRYCC]	40.2	6.74	5	8	9	10	8	12	19	17	3	5	5	3	5	6
Q4DAE1	D-isomer specific 2-hydroxyacid dehydrogenase-protein, putative OS=Trypanosoma cruzi (strain CL Brener) OX=353153 GN=Tc00.1047053510099.120 PE=4 SV=1 - [Q4DAE1_TRYCC]	38.5	6.46	5	12	8	6	5	21	11	9	15	20	20	23	34	32
Q4CQ63	40S ribosomal protein SA OS=Trypanosoma cruzi (strain CL Brener) OX=353153 GN=Tc00.1047053510425.19 PE=1 SV=1 - [Q4CQ63_TRYCC]	27.8	8.18	5	5	6	6	6	6	8	8	2	4	5	2	4	6
Q4D1G9	Centromere/microtubule binding protein cbf5, putative OS=Trypanosoma cruzi (strain CL Brener) OX=353153 GN=Tc00.1047053511145.70 PE=4 SV=1 - [Q4D1G9_TRYCC]	48.6	9.06	5	3			7	3			3	0	3	3	0	3
Q4D916	40S ribosomal protein S16, putative OS=Trypanosoma cruzi (strain CL Brener) OX=353153 GN=Tc00.1047053507513.60 PE=4 SV=1 - [Q4D916_TRYCC]	16.8	10.32	5	5	3	2	8	7	3	2	0	2	2	0	2	2
Q4DW89	Lipophosphoglycan biosynthetic protein, putative OS=Trypanosoma cruzi (strain CL Brener) OX=353153 GN=Tc00.1047053506989.190 PE=3 SV=1 - [Q4DW89_TRYCC]	87	5.4	5	6	7	3	5	10	8	4	0	3	2	0	3	3
Q4DYC7	Trans-sialidase, putative OS=Trypanosoma cruzi (strain CL Brener) OX=353153 GN=Tc00.1047053506683.240 PE=4 SV=1 - [Q4DYC7_TRYCC]	80.9	6.64	5	11	8	9	5	22	10	11	0	0	3	0	0	3
Q4CTR0	Leucyl-tRNA synthetase, putative OS=Trypanosoma cruzi (strain CL Brener) OX=353153 GN=Tc00.1047053511049.40 PE=3 SV=1 - [Q4CTR0_TRYCC]	121.7	7.05	5	4		2	7	4		2	0	4	4	0	6	4
Q4DH98	Proteasome regulatory non-ATPase subunit 8, putative OS=Trypanosoma cruzi (strain CL Brener) OX=353153 GN=Tc00.1047053511285.90 PE=4 SV=1 - [Q4DH98_TRYCC]	41.6	5.58	5	7	4	6	7	9	6	6	0	2	2	0	2	4
Q4DMG9	Acetyltransferase component of pyruvate dehydrogenase complex OS=Trypanosoma cruzi (strain CL Brener) OX=353153 GN=Tc00.1047053509717.20 PE=3 SV=1 - [Q4DMG9_TRYCC]	49.6	6.46	5	4	10	10	10	7	12	14	0	3	3	0	4	5
Q4DGW6	Aminoacylase, putative OS=Trypanosoma cruzi (strain CL Brener) OX=353153 GN=Tc00.1047053506975.40 PE=4 SV=1 - [Q4DGW6_TRYCC]	42.8	6.23	5	2	2	2	6	5	4	3	0	4	5	0	5	8
Q4E2V9	Uncharacterized protein OS=Trypanosoma cruzi (strain CL Brener) OX=353153 GN=Tc00.1047053511283.10 PE=4 SV=1 - [Q4E2V9_TRYCC]	57.9	7.5	5		3	3	6		4	5	0	2	2	0	2	2
Q4CSI2	Uncharacterized protein OS=Trypanosoma cruzi (strain CL Brener) OX=353153 GN=Tc00.1047053506441.20 PE=4 SV=1 - [Q4CSI2_TRYCC]	123.4	5.24	5		2	5	5		3	7	0	3	4	0	5	7
Q4CU61	60S ribosomal protein L5, putative OS=Trypanosoma cruzi (strain CL Brener) OX=353153 GN=Tc00.1047053509671.80 PE=1 SV=1 - [Q4CU61_TRYCC]	34.8	10.17	4	4	7	5	4	5	9	6	2	4	5	2	4	5
Q4D0X5	6-phosphogluconate dehydrogenase, decarboxylating OS=Trypanosoma cruzi (strain CL Brener) OX=353153 GN=Tc00.1047053510663.70 PE=3 SV=1 - [Q4D0X5_TRYCC]	52	8.12	4	5	6	9	6	8	10	14	3	7	6	3	9	10
Q4CT90	40S ribosomal protein S3a, putative (Fragment) OS=Trypanosoma cruzi (strain CL Brener) OX=353153 GN=Tc00.1047053510999.39 PE=3 SV=1 - [Q4CT90_TRYCC]	28.3	10.33	4	5	6	4	4	7	7	4	2	4	4	3	4	4
Q4E4R6	Proteasome subunit beta type OS=Trypanosoma cruzi (strain CL Brener) OX=353153 GN=Tc00.1047053508461.430 PE=3 SV=1 - [Q4E4R6_TRYCC]	33.2	8.95	4	7	8	8	4	16	12	12	2	8	8	2	14	15
Q4DV36	Malic enzyme OS=Trypanosoma cruzi (strain CL Brener) OX=353153 GN=Tc00.1047053508647.280 PE=3 SV=1 - [Q4DV36_TRYCC]	62.7	7.01	4	8	5	6	4	13	9	9	7	11	10	8	22	17
Q4DD13	ADP,ATP carrier protein 1, mitochondrial, putative OS=Trypanosoma cruzi (strain CL Brener) OX=353153 GN=Tc00.1047053511289.70 PE=3 SV=1 - [Q4DD13_TRYCC]	34.9	9.8	4	5		2	5	6		2	2	3	4	4	3	4
Q4DJ68	Malic enzyme OS=Trypanosoma cruzi (strain CL Brener) OX=353153 GN=Tc00.1047053505183.30 PE=3 SV=1 - [Q4DJ68_TRYCC]	62.6	6.81	4	9	5	5	4	14	9	7	7	13	12	7	24	21
Q4CUD7	Transaldolase OS=Trypanosoma cruzi (strain CL Brener) OX=353153 GN=Tc00.1047053503477.20 PE=3 SV=1 - [Q4CUD7_TRYCC]	36.4	6.34	4	2			5	3			2	4	3	2	4	4
Q4DW25	Proteasome subunit beta type OS=Trypanosoma cruzi (strain CL Brener) OX=353153 GN=Tc00.1047053507603.40 PE=3 SV=1 - [Q4DW25_TRYCC]	30.7	7.56	4	5	5	5	4	7	8	6	2	5	5	3	9	10
Q4CRK6	Aspartate aminotransferase OS=Trypanosoma cruzi (strain CL Brener) OX=353153 GN=Tc00.1047053503679.10 PE=4 SV=1 - [Q4CRK6_TRYCC]	44.9	7.46	4	5	5	4	6	6	7	7	4	5	5	4	7	5
Q4CTX0	Flagellar calcium-binding protein, putative OS=Trypanosoma cruzi (strain CL Brener) OX=353153 GN=Tc00.1047053507891.47 PE=4 SV=1 - [Q4CTX0_TRYCC]	23.8	5.01	4	4	4	3	6	5	6	4	3	4	3	3	5	4
Q4CQM4	ADP-ribosylation factor 1, putative OS=Trypanosoma cruzi (strain CL Brener) OX=353153 GN=Tc00.1047053508415.50 PE=3 SV=1 - [Q4CQM4_TRYCC]	20.7	8.7	4	4	3	3	6	5	3	3	2	3	2	3	4	3
Q4CNU0	Phospholipase B-like OS=Trypanosoma cruzi (strain CL Brener) OX=353153 GN=Tc00.1047053510825.30 PE=3 SV=1 - [Q4CNU0_TRYCC]	72.7	6.49	4	7	5	5	5	8	5	6	4	3	4	4	4	6
Q4DHC9	14-3-3 protein, putative OS=Trypanosoma cruzi (strain CL Brener) OX=353153 GN=Tc00.1047053511167.90 PE=3 SV=1 - [Q4DHC9_TRYCC]	29.1	5.12	4	5	5	4	4	7	6	4	2	3	3	3	3	3
Q4D455	Adenosylhomocysteinase OS=Trypanosoma cruzi (strain CL Brener) OX=353153 GN=Tc00.1047053511229.50 PE=3 SV=1 - [Q4D455_TRYCC]	48.4	6.65	4	5	5	5	5	7	6	7	2	12	15	2	21	25
Q4E256	Nucleoside diphosphate kinase OS=Trypanosoma cruzi (strain CL Brener) OX=353153 GN=Tc00.1047053508707.200 PE=1 SV=1 - [Q4E256_TRYCC]	16.9	8.41	4	3	2	3	7	3	2	4	2	5	4	2	5	7
Q4CTD7	Histone H2B OS=Trypanosoma cruzi (strain CL Brener) OX=353153 GN=Tc00.1047053511635.20 PE=3 SV=1 - [Q4CTD7_TRYCC]	12.3	11.63	4	6	7	4	25	8	13	6	2	7	6	3	15	12
Q4D1Q4	Aspartate aminotransferase, mitochondrial, putative OS=Trypanosoma cruzi (strain CL Brener) OX=353153 GN=Tc00.1047053510945.70 PE=4 SV=1 - [Q4D1Q4_TRYCC]	46	8.32	4	5	4	4	7	6	6	4	10	11	11	15	19	17
Q4CLP6	Uncharacterized protein OS=Trypanosoma cruzi (strain CL Brener) OX=353153 GN=Tc00.1047053511687.10 PE=4 SV=1 - [Q4CLP6_TRYCC]	29.6	8.98	4	5			5	7			3	3	4	4	4	8
Q4CUC8	40S ribosomal protein S7 OS=Trypanosoma cruzi (strain CL Brener) OX=353153 GN=Tc00.1047053506593.19 PE=3 SV=1 - [Q4CUC8_TRYCC]	23.9	11.36	4	6	4	6	7	10	6	8	0	5	5	0	7	5
Q4E2M9	Glucose-6-phosphate isomerase OS=Trypanosoma cruzi (strain CL Brener) OX=353153 GN=Tc00.1047053510889.221 PE=3 SV=1 - [Q4E2M9_TRYCC]	68.3	7.21	4	7	6	7	4	9	7	10	0	5	5	0	6	5
Q4D193	Phosphoglycerate kinase OS=Trypanosoma cruzi (strain CL Brener) OX=353153 GN=Tc00.1047053511419.40 PE=3 SV=1 - [Q4D193_TRYCC]	44.4	6.62	4	8	4	2	6	11	5	2	0	2	8	0	2	9
Q4D5P1	Aminopeptidase OS=Trypanosoma cruzi (strain CL Brener) OX=353153 GN=Tc00.1047053511051.70 PE=3 SV=1 - [Q4D5P1_TRYCC]	98.3	5.63	4	7	4	4	7	9	4	5	0	5	4	0	5	4
Q4DU83	40S ribosomal protein S8 OS=Trypanosoma cruzi (strain CL Brener) OX=353153 GN=Tc00.1047053511903.110 PE=1 SV=1 - [Q4DU83_TRYCC]	25.2	10.71	4	2	2	3	6	2	6	6	0	2	2	0	3	3
Q4DPV6	Uncharacterized protein OS=Trypanosoma cruzi (strain CL Brener) OX=353153 GN=Tc00.1047053510877.40 PE=4 SV=1 - [Q4DPV6_TRYCC]	24.4	9.72	4	6	5	3	7	7	9	5	0	5	5	0	8	9
Q4DB91	Pyruvate dehydrogenase E1 component subunit beta OS=Trypanosoma cruzi (strain CL Brener) OX=353153 GN=Tc00.1047053510091.80 PE=4 SV=1 - [Q4DB91_TRYCC]	37.8	5.36	4	2	6	7	5	2	8	11	0	4	6	0	6	9
Q4E2R9	Aminopeptidase, putative OS=Trypanosoma cruzi (strain CL Brener) OX=353153 GN=Tc00.1047053504153.140 PE=4 SV=1 - [Q4E2R9_TRYCC]	59.8	7.34	4	7	6	5	7	13	10	6	0	4	6	0	8	9
Q4CWD6	40S ribosomal protein S13, putative OS=Trypanosoma cruzi (strain CL Brener) OX=353153 GN=Tc00.1047053510029.70 PE=3 SV=1 - [Q4CWD6_TRYCC]	17.2	10.54	4		2		5		2		0	2	2	0	2	2
Q4E5H8	Ribosomal protein OS=Trypanosoma cruzi (strain CL Brener) OX=353153 GN=Tc00.1047053511277.160 PE=3 SV=1 - [Q4E5H8_TRYCC]	24.5	9.64	4		3	4	4		4	6	0	5	5	0	10	13
Q4CQW2	60S ribosomal protein L4, putative OS=Trypanosoma cruzi (strain CL Brener) OX=353153 GN=Tc00.1047053504121.30 PE=1 SV=1 - [Q4CQW2_TRYCC]	41.3	11.58	4		3	2	4		3	3	0	5	3	0	8	6
Q4DJ07	Prostaglandin F synthase OS=Trypanosoma cruzi (strain CL Brener) OX=353153 GN=Tc00.1047053511287.49 PE=1 SV=2 - [PGFS_TRYCC]	32.6	7.05	3	6		2	4	7		2	6	9	11	14	10	12
Q4DEL1	Histone H4 OS=Trypanosoma cruzi (strain CL Brener) OX=353153 GN=Tc00.1047053507941.150 PE=3 SV=1 - [Q4DEL1_TRYCC]	11.2	11.06	3	3	4	2	3	5	6	2	2	6	4	2	8	7
Q4DHA9	Proteasome beta 3 subunit, putative OS=Trypanosoma cruzi (strain CL Brener) OX=353153 GN=Tc00.1047053506779.50 PE=4 SV=1 - [Q4DHA9_TRYCC]	22.4	5.06	3	4	5	4	4	6	8	7	2	5	5	2	9	10
Q4CU39	L-threonine 3-dehydrogenase, putative OS=Trypanosoma cruzi (strain CL Brener) OX=353153 GN=Tc00.1047053507923.10 PE=4 SV=1 - [Q4CU39_TRYCC]	36.9	7.18	3	2	3	3	4	4	4	3	5	4	4	9	8	5
Q4CMF1	Histone H4 OS=Trypanosoma cruzi (strain CL Brener) OX=353153 GN=Tc00.1047053508739.60 PE=3 SV=1 - [Q4CMF1_TRYCC]	11.3	10.92	3	6	3	3	3	8	5	3	2	6	4	2	8	9
Q4DKZ4	60S ribosomal protein L18a OS=Trypanosoma cruzi (strain CL Brener) OX=353153 GN=Tc00.1047053506957.90 PE=3 SV=1 - [Q4DKZ4_TRYCC]	20.8	10.37	3	5	4	3	4	6	5	4	2	4	4	5	5	5
Q4CYQ8	Actin, putative OS=Trypanosoma cruzi (strain CL Brener) OX=353153 GN=Tc00.1047053510571.30 PE=3 SV=1 - [Q4CYQ8_TRYCC]	41.9	5.72	3	7	11	12	6	17	20	19	2	9	8	3	14	11
Q4DDK8	Glycosomal malate dehydrogenase, putative OS=Trypanosoma cruzi (strain CL Brener) OX=353153 GN=Tc00.1047053511293.69 PE=3 SV=1 - [Q4DDK8_TRYCC]	34.1	8.63	3	3	3	3	6	5	4	5	2	6	8	2	8	10
Q4DNZ7	60S ribosomal protein L7, putative OS=Trypanosoma cruzi (strain CL Brener) OX=353153 GN=Tc00.1047053507519.110 PE=1 SV=1 - [Q4DNZ7_TRYCC]	27.8	10.83	3	4	3	4	6	4	3	4	2	5	5	2	9	6
Q4CR48	Gim5A protein, putative OS=Trypanosoma cruzi (strain CL Brener) OX=353153 GN=Tc00.1047053510669.20 PE=4 SV=1 - [Q4CR48_TRYCC]	26.6	8.59	3	3			4	3			2	3	4	4	4	4
Q4CU50	D-isomer specific 2-hydroxyacid dehydrogenase-protein, putative OS=Trypanosoma cruzi (strain CL Brener) OX=353153 GN=Tc00.1047053506263.30 PE=4 SV=1 - [Q4CU50_TRYCC]	39.1	5.88	3	9	5	4	3	13	8	6	7	7	8	10	14	14
Q4CU52	D-isomer specific 2-hydroxyacid dehydrogenase-protein, putative (Fragment) OS=Trypanosoma cruzi (strain CL Brener) OX=353153 GN=Tc00.1047053506263.10 PE=4 SV=1 - [Q4CU52_TRYCC]	28.5	6.58	3	9	7	6	3	16	9	9	12	15	15	18	25	21
Q4DTP7	Carboxypeptidase OS=Trypanosoma cruzi (strain CL Brener) OX=353153 GN=Tc00.1047053509695.210 PE=3 SV=1 - [Q4DTP7_TRYCC]	51.5	5.19	3	3			3	3			0	4	3	0	6	3
Q4CU77	Proteasome beta 2 subunit, putative OS=Trypanosoma cruzi (strain CL Brener) OX=353153 GN=Tc00.1047053503891.100 PE=4 SV=1 - [Q4CU77_TRYCC]	22.7	6.52	3	6	5	5	3	12	9	6	0	6	6	0	15	17
Q4D6T6	Proteasome subunit beta type OS=Trypanosoma cruzi (strain CL Brener) OX=353153 GN=Tc00.1047053507639.40 PE=3 SV=1 - [Q4D6T6_TRYCC]	34.9	5.9	3	6	3	3	4	11	5	6	0	6	3	0	7	4
Q4D0L3	Succinyl-CoA:3-ketoacid-coenzyme A transferase OS=Trypanosoma cruzi (strain CL Brener) OX=353153 GN=Tc00.1047053506301.50 PE=3 SV=1 - [Q4D0L3_TRYCC]	52.7	7.8	3	2	3	5	4	5	4	7	0	3	4	0	6	5
Q4D6N0	T-complex protein 1, beta subunit, putative OS=Trypanosoma cruzi (strain CL Brener) OX=353153 GN=Tc00.1047053508357.90 PE=3 SV=1 - [Q4D6N0_TRYCC]	58.1	6.14	3	3	2	2	5	4	3	3	0	2	2	0	3	3
Q4CVK6	Pyrroline-5-carboxylate synthetase-like protein, putative (Fragment) OS=Trypanosoma cruzi (strain CL Brener) OX=353153 GN=Tc00.1047053503749.5 PE=4 SV=1 - [Q4CVK6_TRYCC]	12.1	10.52	3	3	3	3	3	4	5	4	0	2	2	0	3	2
Q4CM74	Delta-1-pyrroline-5-carboxylate dehydrogenase, putative (Fragment) OS=Trypanosoma cruzi (strain CL Brener) OX=353153 GN=Tc00.1047053509351.10 PE=3 SV=1 - [Q4CM74_TRYCC]	29.5	8.06	3	5	3	5	3	8	3	6	0	6	8	0	11	12
Q4CX87	Tryparedoxin peroxidase, putative OS=Trypanosoma cruzi (strain CL Brener) OX=353153 GN=Tc00.1047053509499.14 PE=4 SV=1 - [Q4CX87_TRYCC]	25.5	7.75	3	2	5	3	3	2	5	3	0	5	5	0	6	6
Q4CNF4	60S ribosomal protein L11, putative OS=Trypanosoma cruzi (strain CL Brener) OX=353153 GN=Tc00.1047053508197.10 PE=1 SV=1 - [Q4CNF4_TRYCC]	22.2	10.13	3	2		2	4	2		2	0	3	3	0	5	3
Q4CR18	Glutamate dehydrogenase, putative (Fragment) OS=Trypanosoma cruzi (strain CL Brener) OX=353153 GN=Tc00.1047053509445.39 PE=4 SV=1 - [Q4CR18_TRYCC]	43.2	6.37	3	4	4	5	5	6	4	7	0	7	7	0	8	10
Q4E595	Asparaginyl-tRNA synthetase, putative OS=Trypanosoma cruzi (strain CL Brener) OX=353153 GN=Tc00.1047053506559.350 PE=4 SV=1 - [Q4E595_TRYCC]	84.5	6.86	3	4	2	3	4	4	2	3	0	3	4	0	4	5
Q4DHH6	26S protease regulatory subunit, putative OS=Trypanosoma cruzi (strain CL Brener) OX=353153 GN=Tc00.1047053510265.20 PE=3 SV=1 - [Q4DHH6_TRYCC]	44.5	7.52	3	3	10	10	3	3	15	18	0	2	2	0	3	2
Q4E5I4	Citrate synthase OS=Trypanosoma cruzi (strain CL Brener) OX=353153 GN=Tc00.1047053511277.110 PE=3 SV=1 - [Q4E5I4_TRYCC]	52.5	8.37	3	3	7	6	7	5	8	8	0	4	4	0	6	5
Q4DLG3	2-methoxy-6-polyprenyl-1,4-benzoquinol methylase, mitochondrial OS=Trypanosoma cruzi (strain CL Brener) OX=353153 GN=Tc00.1047053503823.160 PE=3 SV=1 - [Q4DLG3_TRYCC]	32.6	5.81	3	2	5	5	3	2	7	7	0	4	2	0	4	3
Q4CTU6	Proteasome endopeptidase complex OS=Trypanosoma cruzi (strain CL Brener) OX=353153 GN=Tc00.1047053507775.50 PE=3 SV=1 - [Q4CTU6_TRYCC]	25.7	6.21	3	3	2	2	4	4	4	2	0	4	4	0	6	5
Q4DED2	Ribosomal protein L21E (60S), putative OS=Trypanosoma cruzi (strain CL Brener) OX=353153 GN=Tc00.1047053506405.149 PE=1 SV=1 - [Q4DED2_TRYCC]	18.1	10.93	3	2	2	3	3	3	2	3	0	4	2	0	4	2
Q4CWE9	Histone H3, putative OS=Trypanosoma cruzi (strain CL Brener) OX=353153 GN=Tc00.1047053505931.50 PE=3 SV=1 - [Q4CWE9_TRYCC]	14.8	11.28	3	3	3	2	3	4	3	2	0	3	2	0	5	2
Q4E132	Prolyl oligopeptidase, putative OS=Trypanosoma cruzi (strain CL Brener) OX=353153 GN=Tc00.1047053506247.230 PE=4 SV=1 - [Q4E132_TRYCC]	78.3	5.67	3	5			3	6			0	2	4	0	2	4
Q4DXL4	Alpha-mannosidase OS=Trypanosoma cruzi (strain CL Brener) OX=353153 GN=Tc00.1047053506195.120 PE=3 SV=1 - [Q4DXL4_TRYCC]	111.2	6.93	3	14	13	12	4	22	19	18	0	6	6	0	7	9
Q4D5K2	60S ribosomal protein L2, putative OS=Trypanosoma cruzi (strain CL Brener) OX=353153 GN=Tc00.1047053508299.60 PE=4 SV=1 - [Q4D5K2_TRYCC]	28.4	10.68	3			2	4			3	0	2	3	0	2	3
Q4E661	60S ribosomal protein L13 OS=Trypanosoma cruzi (strain CL Brener) OX=353153 GN=Tc00.1047053508153.280 PE=1 SV=1 - [Q4E661_TRYCC]	25.3	11.3	3		3	4	3		5	6	0	3	4	0	5	5
Q4DJ69	Malic enzyme OS=Trypanosoma cruzi (strain CL Brener) OX=353153 GN=Tc00.1047053505183.20 PE=3 SV=1 - [Q4DJ69_TRYCC]	63.6	6.57	3		3		3		5		0	3	3	0	3	3
Q4E4R8	T-complex protein 1, eta subunit, putative OS=Trypanosoma cruzi (strain CL Brener) OX=353153 GN=Tc00.1047053508461.410 PE=3 SV=1 - [Q4E4R8_TRYCC]	61.4	7.52	3		2	2	3		3	3	0	2	4	0	2	5
Q4D7A0	60S ribosomal protein L13a, putative OS=Trypanosoma cruzi (strain CL Brener) OX=353153 GN=Tc00.1047053506315.50 PE=3 SV=1 - [Q4D7A0_TRYCC]	25.6	10.84	3			2	5			3	0	4	3	0	4	3
Q4DIV9	60S ribosomal protein L6, putative OS=Trypanosoma cruzi (strain CL Brener) OX=353153 GN=Tc00.1047053507709.50 PE=1 SV=1 - [Q4DIV9_TRYCC]	21.4	10.7	3			3	3			4	0	6	7	0	9	9
Q4CXR7	Vacuolar ATP synthase subunit B, putative OS=Trypanosoma cruzi (strain CL Brener) OX=353153 GN=Tc00.1047053511209.10 PE=3 SV=1 - [Q4CXR7_TRYCC]	55.5	5.59	3		2	2	3		2	2	0	3	4	0	4	5
Q4CYU3	Calpain-like cysteine peptidase, putative OS=Trypanosoma cruzi (strain CL Brener) OX=353153 GN=Tc00.1047053506983.39 PE=4 SV=1 - [Q4CYU3_TRYCC]	12.8	5.11	2	2	2		2	5	2		2	2	2	3	5	4
Q4E4L9	Peptidyl-prolyl cis-trans isomerase OS=Trypanosoma cruzi (strain CL Brener) OX=353153 GN=Tc00.1047053506925.300 PE=3 SV=1 - [Q4E4L9_TRYCC]	18.8	8.29	2	4	3	3	2	5	3	3	5	2	2	7	3	2
Q4CV42	Calpain-like cysteine peptidase, putative OS=Trypanosoma cruzi (strain CL Brener) OX=353153 GN=Tc00.1047053509001.40 PE=4 SV=1 - [Q4CV42_TRYCC]	16.7	6.34	2	3			2	3			2	3	2	2	3	2
Q4E2N6	Alanine aminotransferase, putative OS=Trypanosoma cruzi (strain CL Brener) OX=353153 GN=Tc00.1047053510889.140 PE=4 SV=1 - [Q4E2N6_TRYCC]	54.9	7.53	2	4	5	4	2	5	6	5	2	4	3	4	8	7
Q4CUS9	Trans-sialidase, putative OS=Trypanosoma cruzi (strain CL Brener) OX=353153 GN=Tc00.1047053503759.10 PE=4 SV=1 - [Q4CUS9_TRYCC]	81.7	8.7	2	5	2	2	2	7	2	4	2	2	2	4	3	2
Q4DZR8	Procyclic form surface glycoprotein, putative OS=Trypanosoma cruzi (strain CL Brener) OX=353153 GN=Tc00.1047053507711.100 PE=4 SV=1 - [Q4DZR8_TRYCC]	42.7	8.29	2	5	6	4	2	11	7	6	6	6	3	10	7	5
Q4E5N8	Alanine aminotransferase, putative OS=Trypanosoma cruzi (strain CL Brener) OX=353153 GN=Tc00.1047053506529.430 PE=4 SV=1 - [Q4E5N8_TRYCC]	55	6.96	2	3	4	4	2	4	6	6	2	4	4	3	9	10
Q4DUG8	Cystathione gamma lyase, putative OS=Trypanosoma cruzi (strain CL Brener) OX=353153 GN=Tc00.1047053510661.250 PE=3 SV=1 - [Q4DUG8_TRYCC]	44.5	7.65	2	3	4	4	4	7	8	7	2	6	7	5	16	17
Q4DYW2	Trans-sialidase, putative OS=Trypanosoma cruzi (strain CL Brener) OX=353153 GN=Tc00.1047053507167.80 PE=4 SV=1 - [Q4DYW2_TRYCC]	78.5	5.47	2	4	5	4	2	6	7	7	3	4	4	5	4	7
Q4DQC4	Uncharacterized protein OS=Trypanosoma cruzi (strain CL Brener) OX=353153 GN=Tc00.1047053506629.200 PE=4 SV=1 - [Q4DQC4_TRYCC]	37.5	5.97	2	4			3	5			3	3	3	3	3	3
Q4DFL2	I/6 autoantigen, putative OS=Trypanosoma cruzi (strain CL Brener) OX=353153 GN=Tc00.1047053508323.100 PE=4 SV=1 - [Q4DFL2_TRYCC]	23.2	5.26	2	4	2	3	3	6	4	3	7	7	7	8	11	10
Q4E3A4	60S acidic ribosomal protein P0 OS=Trypanosoma cruzi (strain CL Brener) OX=353153 GN=Tc00.1047053508355.250 PE=3 SV=1 - [Q4E3A4_TRYCC]	34.9	5.05	2	4	5	4	4	4	5	5	0	3	4	0	4	4
Q4CSC4	S-adenosylmethionine synthase OS=Trypanosoma cruzi (strain CL Brener) OX=353153 GN=Tc00.1047053506945.160 PE=3 SV=1 - [Q4CSC4_TRYCC]	43.5	6.48	2	3	3	4	2	4	3	5	0	7	5	0	10	10
Q4DDN8	Vesicle-associated membrane protein, putative OS=Trypanosoma cruzi (strain CL Brener) OX=353153 GN=Tc00.1047053507811.60 PE=4 SV=1 - [Q4DDN8_TRYCC]	24.1	8.5	2	3	3	3	2	5	5	7	0	3	3	0	4	5
Q4DW38	40S ribosomal protein S24 OS=Trypanosoma cruzi (strain CL Brener) OX=353153 GN=Tc00.1047053507681.150 PE=1 SV=1 - [Q4DW38_TRYCC]	15.7	11.08	2	2	2	2	2	3	3	2	0	3	2	0	3	2
Q4DXL5	Malate dehydrogenase OS=Trypanosoma cruzi (strain CL Brener) OX=353153 GN=Tc00.1047053506195.110 PE=3 SV=1 - [Q4DXL5_TRYCC]	33.3	8.21	2	2	7	6	3	3	8	8	0	8	9	0	13	15
Q4CY73	Histone H2A OS=Trypanosoma cruzi (strain CL Brener) OX=353153 GN=Tc00.1047053511323.40 PE=3 SV=1 - [Q4CY73_TRYCC]	18.6	10.54	2	3	4	2	2	3	5	2	0	3	3	0	4	5
Q4D823	Retrotransposon hot spot (RHS) protein, putative OS=Trypanosoma cruzi (strain CL Brener) OX=353153 GN=Tc00.1047053511007.20 PE=4 SV=1 - [Q4D823_TRYCC]	80.1	7.24	2	2			3	2			0	2	2	0	2	2
Q4DY30	RNA-binding protein, putative OS=Trypanosoma cruzi (strain CL Brener) OX=353153 GN=Tc00.1047053511727.290 PE=4 SV=1 - [Q4DY30_TRYCC]	26.9	11.05	2	2	3		2	2	4		0	4	2	0	4	2
Q4DCW2	Alpha-mannosidase OS=Trypanosoma cruzi (strain CL Brener) OX=353153 GN=Tc00.1047053506407.10 PE=3 SV=1 - [Q4DCW2_TRYCC]	111.1	6.9	2	13	12	12	3	21	17	18	0	7	7	0	8	10
Q4DWI7	Proteasome regulatory non-ATPase subunit, putative OS=Trypanosoma cruzi (strain CL Brener) OX=353153 GN=Tc00.1047053511725.10 PE=4 SV=1 - [Q4DWI7_TRYCC]	31.9	6.55	2	5	6	4	3	7	7	4	0	2	2	0	3	3
Q4D5M2	RuvB-like helicase OS=Trypanosoma cruzi (strain CL Brener) OX=353153 GN=Tc00.1047053505989.82 PE=3 SV=1 - [Q4D5M2_TRYCC]	50.1	6.24	2	3	5	3	3	3	6	3	0	4	6	0	5	6
Q4D531	60S ribosomal protein L7a, putative OS=Trypanosoma cruzi (strain CL Brener) OX=353153 GN=Tc00.1047053510835.40 PE=4 SV=1 - [Q4D531_TRYCC]	34.5	11.12	2	3	4	3	3	4	5	4	0	3	3	0	5	6
Q4D449	Glycyl-tRNA synthetase, putative OS=Trypanosoma cruzi (strain CL Brener) OX=353153 GN=Tc00.1047053511229.110 PE=4 SV=1 - [Q4D449_TRYCC]	70.1	6.02	2	3			3	4			0	5	8	0	7	9
Q4D7V3	Lysine--tRNA ligase OS=Trypanosoma cruzi (strain CL Brener) OX=353153 GN=Tc00.1047053508971.30 PE=3 SV=1 - [Q4D7V3_TRYCC]	65.9	6.29	2	2	2		2	2	2		0	6	7	0	6	9
Q4E396	Uncharacterized protein OS=Trypanosoma cruzi (strain CL Brener) OX=353153 GN=Tc00.1047053508355.330 PE=4 SV=1 - [Q4E396_TRYCC]	59.1	8.59	2	2	2	2	2	2	2	2	0	3	2	0	3	2
Q4CTS7	Tryptophanyl-tRNA synthetase, putative OS=Trypanosoma cruzi (strain CL Brener) OX=353153 GN=Tc00.1047053510647.30 PE=3 SV=1 - [Q4CTS7_TRYCC]	44.3	7.06	2	3			2	7			0	4	4	0	4	4
Q4D0Z5	Glycyl-tRNA synthetase, putative (Fragment) OS=Trypanosoma cruzi (strain CL Brener) OX=353153 GN=Tc00.1047053504017.79 PE=4 SV=1 - [Q4D0Z5_TRYCC]	37	6.34	2	2			3	2			0	5	6	0	7	6
Q4CRX5	60S ribosomal protein L17, putative OS=Trypanosoma cruzi (strain CL Brener) OX=353153 GN=Tc00.1047053503449.10 PE=3 SV=1 - [Q4CRX5_TRYCC]	19.1	10.84	2		2		2		2		0	3	2	0	4	2
Q4E0X3	Nucleolar RNA binding protein, putative OS=Trypanosoma cruzi (strain CL Brener) OX=353153 GN=Tc00.1047053508277.230 PE=4 SV=1 - [Q4E0X3_TRYCC]	55	9.19	2			2	2			2	0	2	4	0	2	5
Q4DTP9	T-complex protein 1 subunit delta OS=Trypanosoma cruzi (strain CL Brener) OX=353153 GN=Tc00.1047053509695.200 PE=3 SV=1 - [Q4DTP9_TRYCC]	58.7	7.55	2		3	2	2		4	3	0	4	6	0	6	8
Q4CNC1	Aspartyl-tRNA synthetase, putative OS=Trypanosoma cruzi (strain CL Brener) OX=353153 GN=Tc00.1047053510777.20 PE=3 SV=1 - [Q4CNC1_TRYCC]	63.5	6.33	2		2	2	2		2	3	0	4	3	0	5	4
Q4DDU4	Trans-sialidase, putative OS=Trypanosoma cruzi (strain CL Brener) OX=353153 GN=Tc00.1047053506751.50 PE=4 SV=1 - [Q4DDU4_TRYCC]	80.3	5.48		2	5	5		4	7	10	2	2	3	4	2	5
Q4E1E4	Trans-sialidase, putative OS=Trypanosoma cruzi (strain CL Brener) OX=353153 GN=Tc00.1047053508139.240 PE=4 SV=1 - [Q4E1E4_TRYCC]	83.9	6.86		4	3	3		6	3	6	2	2	2	4	3	2
Q4DZT1	Glyceraldehyde-3-phosphate dehydrogenase OS=Trypanosoma cruzi (strain CL Brener) OX=353153 GN=Tc00.1047053510105.230 PE=1 SV=1 - [Q4DZT1_TRYCC]	36.4	8.46		4	4	4		6	5	5	3	0	2	3	0	2
Q4CSV0	Trans-sialidase, putative OS=Trypanosoma cruzi (strain CL Brener) OX=353153 GN=Tc00.1047053508563.20 PE=4 SV=1 - [Q4CSV0_TRYCC]	90.1	5.24		2	4	5		4	4	8	2	2	2	4	3	2
Q4E3G9	Trans-sialidase, putative OS=Trypanosoma cruzi (strain CL Brener) OX=353153 GN=Tc00.1047053507611.170 PE=4 SV=1 - [Q4E3G9_TRYCC]	85.4	6.51		3	4	4		5	5	8	2	2	2	4	3	2
Q4DI29	Superoxide dismutase OS=Trypanosoma cruzi (strain CL Brener) OX=353153 GN=Tc00.1047053511019.90 PE=1 SV=1 - [Q4DI29_TRYCC]	21.9	7.17		2	2	3		4	3	3	2	2	2	3	2	2
Q4DXW9	Phosphoribosylpyrophosphate synthetase, putative OS=Trypanosoma cruzi (strain CL Brener) OX=353153 GN=Tc00.1047053510431.250 PE=4 SV=1 - [Q4DXW9_TRYCC]	39.6	7.23		2	2	2		2	2	4	2	7	5	2	7	7
Q4E0D0	Trans-sialidase, putative OS=Trypanosoma cruzi (strain CL Brener) OX=353153 GN=Tc00.1047053509875.80 PE=4 SV=1 - [Q4E0D0_TRYCC]	81.7	8.75		5	6	5		7	6	8	3	2	2	6	3	2
Q4CTX9	Cysteine peptidase, putative (Fragment) OS=Trypanosoma cruzi (strain CL Brener) OX=353153 GN=Tc00.1047053508595.50 PE=3 SV=1 - [Q4CTX9_TRYCC]	19.3	7.85		2		2		3		2	2	3	3	4	5	5
Q4E2I6	Succinate--CoA ligase [ADP-forming] subunit alpha, mitochondrial OS=Trypanosoma cruzi (strain CL Brener) OX=353153 GN=Tc00.1047053508479.340 PE=3 SV=1 - [Q4E2I6_TRYCC]	31.8	8.16			2	2			3	3	2	6	6	3	8	10
Q4D6K2	Trans-sialidase, putative OS=Trypanosoma cruzi (strain CL Brener) OX=353153 GN=Tc00.1047053511885.20 PE=4 SV=1 - [Q4D6K2_TRYCC]	84.6	5.78		5	5	5		8	5	8	3	2	2	6	3	2
Q4CR14	Trans-sialidase, putative OS=Trypanosoma cruzi (strain CL Brener) OX=353153 GN=Tc00.1047053422867.10 PE=4 SV=1 - [Q4CR14_TRYCC]	76.4	5.4		4	5	4		6	7	7	2	3	3	4	3	5
Q4CSS2	Trans-sialidase, putative OS=Trypanosoma cruzi (strain CL Brener) OX=353153 GN=Tc00.1047053509281.20 PE=4 SV=1 - [Q4CSS2_TRYCC]	79.2	6.25		4	3	3		7	3	5	5	6	6	10	9	6
Q4D4B5	Trans-sialidase, putative OS=Trypanosoma cruzi (strain CL Brener) OX=353153 GN=Tc00.1047053508451.60 PE=4 SV=1 - [Q4D4B5_TRYCC]	85.8	5.38		2	3	2		4	3	4	2	4	4	4	5	5
Q4CXJ6	Spermidine synthase, putative OS=Trypanosoma cruzi (strain CL Brener) OX=353153 GN=Tc00.1047053510337.40 PE=3 SV=1 - [Q4CXJ6_TRYCC]	33.1	5.52		2	2			3	2		2	3	3	2	4	4
Q4CXW2	Elongation factor 1-gamma (EF-1-gamma), putative OS=Trypanosoma cruzi (strain CL Brener) OX=353153 GN=Tc00.1047053510163.20 PE=4 SV=1 - [Q4CXW2_TRYCC]	46.6	6.18		2	4	4		4	5	5	2	6	6	3	10	8
Q4CR95	Trans-sialidase, putative OS=Trypanosoma cruzi (strain CL Brener) OX=353153 GN=Tc00.1047053509739.10 PE=4 SV=1 - [Q4CR95_TRYCC]	88.8	5.39		3	5	5		8	9	13	2	2	2	4	3	2
Q4D825	Trans-sialidase, putative OS=Trypanosoma cruzi (strain CL Brener) OX=353153 GN=Tc00.1047053508285.60 PE=4 SV=1 - [Q4D825_TRYCC]	85.1	5.52		2	3	4		4	3	6	2	2	2	4	3	2
Q4CSU2	Trans-sialidase, putative OS=Trypanosoma cruzi (strain CL Brener) OX=353153 GN=Tc00.1047053505779.20 PE=4 SV=1 - [Q4CSU2_TRYCC]	80	6.65		4	3	3		7	4	5	2	2	2	4	3	2
Q4DGL0	DNAK protein, putative (Fragment) OS=Trypanosoma cruzi (strain CL Brener) OX=353153 GN=Tc00.1047053511257.10 PE=3 SV=1 - [Q4DGL0_TRYCC]	30.1	4.96		2	5	2		5	7	4	3	4	7	3	10	10
Q4DV74	Trans-sialidase, putative OS=Trypanosoma cruzi (strain CL Brener) OX=353153 GN=Tc00.1047053508173.120 PE=4 SV=1 - [Q4DV74_TRYCC]	41.8	7.59		3	3	2		3	3	2	4	4	2	8	4	2
Q4D8S3	Trans-sialidase, putative OS=Trypanosoma cruzi (strain CL Brener) OX=353153 GN=Tc00.1047053511349.100 PE=4 SV=1 - [Q4D8S3_TRYCC]	90.7	5.15		2	4	4		4	4	6	2	2	2	4	3	2
Q4D965	Uncharacterized protein OS=Trypanosoma cruzi (strain CL Brener) OX=353153 GN=Tc00.1047053506725.20 PE=4 SV=1 - [Q4D965_TRYCC]	66.4	6.47		5		2		5		2	3	4	4	4	4	7
Q4D7U7	Uncharacterized protein OS=Trypanosoma cruzi (strain CL Brener) OX=353153 GN=Tc00.1047053506591.30 PE=4 SV=1 - [Q4D7U7_TRYCC]	30.7	5.74		3	2			4	3		5	7	8	9	8	9
Q4E0J7	Cysteine peptidase, putative OS=Trypanosoma cruzi (strain CL Brener) OX=353153 GN=Tc00.1047053509429.320 PE=3 SV=1 - [Q4E0J7_TRYCC]	49.8	5.6		3		2		5		2	2	5	5	4	6	7
Q4CMZ8	Trans-sialidase, putative OS=Trypanosoma cruzi (strain CL Brener) OX=353153 GN=Tc00.1047053511891.10 PE=4 SV=1 - [Q4CMZ8_TRYCC]	81.5	5.92		3	4	4		5	6	6	2	3	2	3	3	4
Q4DCG7	Trans-sialidase, putative OS=Trypanosoma cruzi (strain CL Brener) OX=353153 GN=Tc00.1047053507479.20 PE=4 SV=1 - [Q4DCG7_TRYCC]	89	5.71		4	3	4		6	3	7	3	2	2	6	3	2
Q4CUU4	Trans-sialidase, putative OS=Trypanosoma cruzi (strain CL Brener) OX=353153 GN=Tc00.1047053509187.10 PE=4 SV=1 - [Q4CUU4_TRYCC]	81.8	9.11		4	3	3		6	3	5	2	3	3	4	4	3
Q4DAZ6	Heat shock 70 kDa protein, putative (Fragment) OS=Trypanosoma cruzi (strain CL Brener) OX=353153 GN=Tc00.1047053506135.9 PE=3 SV=1 - [Q4DAZ6_TRYCC]	30.1	6.62		3	6	7		7	10	15	4	9	11	11	21	20
Q4CYG9	Trans-sialidase, putative OS=Trypanosoma cruzi (strain CL Brener) OX=353153 GN=Tc00.1047053510817.50 PE=4 SV=1 - [Q4CYG9_TRYCC]	79.6	7.72		3	3	3		6	3	6	8	4	4	11	5	4
Q4DM78	Trans-sialidase, putative OS=Trypanosoma cruzi (strain CL Brener) OX=353153 GN=Tc00.1047053511301.160 PE=4 SV=1 - [Q4DM78_TRYCC]	76.4	8.02		3	3	3		5	5	5	2	3	3	3	3	5
Q4CZ65	Trans-sialidase, putative OS=Trypanosoma cruzi (strain CL Brener) OX=353153 GN=Tc00.1047053507213.40 PE=4 SV=1 - [Q4CZ65_TRYCC]	79.1	5.76		2	2	3		4	2	6	4	4	4	16	6	4
Q4CRZ2	Trans-sialidase, putative OS=Trypanosoma cruzi (strain CL Brener) OX=353153 GN=Tc00.1047053509185.30 PE=4 SV=1 - [Q4CRZ2_TRYCC]	85.9	7.33		4	4	4		6	6	7	2	3	3	3	3	5
Q4CTA6	Trans-sialidase, putative OS=Trypanosoma cruzi (strain CL Brener) OX=353153 GN=Tc00.1047053507125.10 PE=4 SV=1 - [Q4CTA6_TRYCC]	85.8	8.48		2	2	2		4	4	4	2	4	4	3	4	6
Q4CL09	Heat shock 70 kDa protein, mitochondrial, putative (Fragment) OS=Trypanosoma cruzi (strain CL Brener) OX=353153 GN=Tc00.1047053432677.20 PE=3 SV=1 - [Q4CL09_TRYCC]	20.4	9.74		5	8	8		7	17	13	3	8	8	3	17	20
Q4E158	Trans-sialidase, putative OS=Trypanosoma cruzi (strain CL Brener) OX=353153 GN=Tc00.1047053511585.230 PE=4 SV=1 - [Q4E158_TRYCC]	79.2	5.83		2	3	3		4	3	5	2	2	2	4	3	2
Q4CRM4	Asparagine synthetase A, putative OS=Trypanosoma cruzi (strain CL Brener) OX=353153 GN=Tc00.1047053503625.10 PE=4 SV=1 - [Q4CRM4_TRYCC]	39	6.24		4	3	3		6	3	4	0	2	2	0	3	4
Q4D4C9	3-hydroxy-3-methylglutaryl coenzyme A reductase OS=Trypanosoma cruzi (strain CL Brener) OX=353153 GN=Tc00.1047053506831.40 PE=3 SV=1 - [Q4D4C9_TRYCC]	46.1	8.35		2		2		4		2	0	6	6	0	12	10
Q4DYE3	Surface protease GP63, putative OS=Trypanosoma cruzi (strain CL Brener) OX=353153 GN=Tc00.1047053506321.240 PE=4 SV=1 - [Q4DYE3_TRYCC]	59.4	6.58		3		3		3		4	0	2	2	0	3	2
Q4CW30	Oligopeptidase B, putative OS=Trypanosoma cruzi (strain CL Brener) OX=353153 GN=Tc00.1047053503995.50 PE=4 SV=1 - [Q4CW30_TRYCC]	80.9	6.18		3	4			4	4		0	4	3	0	5	5
Q4DYD9	Stress-induced protein sti1, putative OS=Trypanosoma cruzi (strain CL Brener) OX=353153 GN=Tc00.1047053506321.290 PE=4 SV=1 - [Q4DYD9_TRYCC]	63.1	6.64		3	8	8		4	10	11	0	7	6	0	10	7
Q4DPV3	RuvB-like helicase OS=Trypanosoma cruzi (strain CL Brener) OX=353153 GN=Tc00.1047053510877.60 PE=3 SV=1 - [Q4DPV3_TRYCC]	52.7	5.81		3	3	3		4	3	7	0	5	4	0	6	7
Q4DQJ3	Eukaryotic translation initiation factor 3 subunit 8, putative OS=Trypanosoma cruzi (strain CL Brener) OX=353153 GN=Tc00.1047053507723.130 PE=4 SV=1 - [Q4DQJ3_TRYCC]	82.2	5.43		2		3		2		4	0	3	3	0	3	3
Q4CPY4	Trans-sialidase, putative OS=Trypanosoma cruzi (strain CL Brener) OX=353153 GN=Tc00.1047053510569.10 PE=4 SV=1 - [Q4CPY4_TRYCC]	49.7	5.76		3	4	5		5	8	7	0	2	2	0	2	4
Q4DD39	Glucosamine-6-phosphate isomerase OS=Trypanosoma cruzi (strain CL Brener) OX=353153 GN=Tc00.1047053511025.50 PE=3 SV=1 - [Q4DD39_TRYCC]	31.4	8.25		2	2	3		4	2	3	0	9	9	0	10	15
Q4D5K5	Trans-sialidase, putative OS=Trypanosoma cruzi (strain CL Brener) OX=353153 GN=Tc00.1047053511219.40 PE=4 SV=1 - [Q4D5K5_TRYCC]	86.7	5.95		5	8	9		7	14	12	0	2	2	0	2	4
Q4CPT6	Trans-sialidase, putative OS=Trypanosoma cruzi (strain CL Brener) OX=353153 GN=Tc00.1047053507879.10 PE=4 SV=1 - [Q4CPT6_TRYCC]	86.4	6.07		2	2	3		4	4	5	0	2	2	0	2	4
Q4DC15	Trans-sialidase, putative OS=Trypanosoma cruzi (strain CL Brener) OX=353153 GN=Tc00.1047053510005.20 PE=4 SV=1 - [Q4DC15_TRYCC]	74.6	5.26		2	3	3		4	7	5	0	3	3	0	5	7
Q4E3G1	Eukaryotic translation initiation factor 3 subunit 8, putative OS=Trypanosoma cruzi (strain CL Brener) OX=353153 GN=Tc00.1047053507611.310 PE=4 SV=1 - [Q4E3G1_TRYCC]	82.2	5.5		2		2		2		3	0	4	4	0	4	4
Q4E151	Chaperonin, putative OS=Trypanosoma cruzi (strain CL Brener) OX=353153 GN=Tc00.1047053506247.50 PE=3 SV=1 - [Q4E151_TRYCC]	58.3	5.47		4	5	8		5	7	13	0	3	4	0	3	4
Q4E2R7	Carboxypeptidase, putative OS=Trypanosoma cruzi (strain CL Brener) OX=353153 GN=Tc00.1047053504153.160 PE=4 SV=1 - [Q4E2R7_TRYCC]	57.6	6.3		4		2		4		2	0	4	5	0	5	7
Q4E544	Mitochondrial RNA-binding protein 2, putative OS=Trypanosoma cruzi (strain CL Brener) OX=353153 GN=Tc00.1047053510359.270 PE=4 SV=1 - [Q4E544_TRYCC]	25.3	9.54		3	3	2		3	4	2	0	2	5	0	2	6
Q4DH94	Mitochondrial DNA polymerase beta, putative OS=Trypanosoma cruzi (strain CL Brener) OX=353153 GN=Tc00.1047053503955.20 PE=4 SV=1 - [Q4DH94_TRYCC]	45.5	8.76		3	5	2		3	5	2	0	4	6	0	4	7
Q4CVH4	Glutamate dehydrogenase, putative (Fragment) OS=Trypanosoma cruzi (strain CL Brener) OX=353153 GN=Tc00.1047053505843.10 PE=4 SV=1 - [Q4CVH4_TRYCC]	24.1	6.3		4	2	2		5	3	2	0	3	2	0	5	3
Q4CTR5	40S ribosomal protein L14, putative OS=Trypanosoma cruzi (strain CL Brener) OX=353153 GN=Tc00.1047053506861.30 PE=4 SV=1 - [Q4CTR5_TRYCC]	20.7	11.19			2	2			2	2	0	2	2	0	2	3
Q4D6Z4	Adenylate kinase, putative OS=Trypanosoma cruzi (strain CL Brener) OX=353153 GN=Tc00.1047053503479.30 PE=3 SV=1 - [Q4D6Z4_TRYCC]	29.3	5.76			4	4			4	5	0	2	4	0	2	5
Q4DW49	Succinate--CoA ligase [ADP-forming] subunit beta, mitochondrial OS=Trypanosoma cruzi (strain CL Brener) OX=353153 GN=Tc00.1047053507681.20 PE=3 SV=1 - [Q4DW49_TRYCC]	45.2	8.05			4	5			5	6	0	7	10	0	10	13
Q4DCN0	Eukaryotic translation initiation factor 3 subunit 7-like protein, putative OS=Trypanosoma cruzi (strain CL Brener) OX=353153 GN=Tc00.1047053506943.160 PE=3 SV=1 - [Q4DCN0_TRYCC]	57.4	5.8			2	2			2	2	0	2	3	0	3	3
Q4CP08	Coatomer subunit epsilon OS=Trypanosoma cruzi (strain CL Brener) OX=353153 GN=Tc00.1047053504217.10 PE=3 SV=1 - [Q4CP08_TRYCC]	34.7	5.54			2	2			3	4	0	2	2	0	2	2
Q4CM88	Cystathione gamma lyase, putative (Fragment) OS=Trypanosoma cruzi (strain CL Brener) OX=353153 GN=Tc00.1047053510739.19 PE=3 SV=1 - [Q4CM88_TRYCC]	19	6.3			2	2			2	2	0	3	3	0	7	6
Q4CLP3	Succinyl-CoA ligase [GDP-forming] beta-chain, putative (Fragment) OS=Trypanosoma cruzi (strain CL Brener) OX=353153 GN=Tc00.1047053507767.10 PE=4 SV=1 - [Q4CLP3_TRYCC]	34.5	5.88			5	6			6	7	0	7	9	0	10	12
