# Supplementary material for: Biophysical and Biochemical Comparison of Extracellular Vesicles Produced by Infective and Non-Infective Stages of Trypanosoma cruzi
Source: MDPI journal article supplement (doi:10.3390/ijms22105183), 2021-05-13
Supplement: s1 [file s1 › Supplementary Table S2.xlsx]

## Sheet: GO enrichment  E
GO ID	GO Term	Genes in the bkgd with this term	Genes in your result with this term	Percent of bkgd genes in your result	Fold enrichment	Odds ratio	P-value	Benjamini	Bonferroni
GO:0046982	protein heterodimerization activity	26	13	50.0	18.75	39.47	1.67e-14	1.66e-12	4.97e-12
GO:0003735	structural constituent of ribosome	144	25	17.4	6.51	8.83	3.23e-14	1.85e-12	9.63e-12
GO:0004298	threonine-type endopeptidase activity	13	10	76.9	28.85	129.29	3.72e-14	1.85e-12	1.11e-11
GO:0070003	threonine-type peptidase activity	13	10	76.9	28.85	129.29	3.72e-14	1.85e-12	1.11e-11
GO:0046983	protein dimerization activity	32	13	40.6	15.24	26.98	4.85e-13	2.06e-11	1.44e-10
GO:1901363	heterocyclic compound binding	1337	69	5.2	1.94	2.67	2.97e-9	9.84e-8	8.86e-7
GO:0097159	organic cyclic compound binding	1337	69	5.2	1.94	2.67	2.97e-9	9.84e-8	8.86e-7
GO:0016903	oxidoreductase activity, acting on the aldehyde or oxo group of donors	19	8	42.1	15.79	27.82	1.27e-8	3.80e-7	3.80e-6
GO:0016491	oxidoreductase activity	239	24	10.0	3.77	4.58	1.44e-8	3.90e-7	4.29e-6	Representado a partir de e-3 (menos de o.o1)
GO:0003824	catalytic activity	1963	85	4.3	1.62	2.31	8.63e-8	2.14e-6	2.57e-5
GO:0003676	nucleic acid binding	686	38	5.5	2.08	2.47	7.11e-6	1.63e-4	2.12e-3
GO:0016620	oxidoreductase activity, acting on the aldehyde or oxo group of donors, NAD or NADP as acceptor	13	5	38.5	14.43	23.48	1.37e-5	2.92e-4	4.09e-3

## Sheet: GO enrichment  TCT
GO ID	GO Term	Genes in the bkgd with this term	Genes in your result with this term	Percent of bkgd genes in your result	Fold enrichment	Odds ratio	P-value	Benjamini	Bonferroni
GO:0097159	organic cyclic compound binding	1337	88	6.6	2.26	3.56	3.51e-16	2.45e-14	1.05e-13
GO:1901363	heterocyclic compound binding	1337	88	6.6	2.26	3.56	3.51e-16	2.45e-14	1.05e-13
GO:0003735	structural constituent of ribosome	144	28	19.4	6.66	9.28	4.09e-16	2.45e-14	1.23e-13
GO:0046982	protein heterodimerization activity	26	14	53.8	18.45	41.90	1.42e-15	7.08e-14	4.25e-13
GO:0046983	protein dimerization activity	32	14	43.8	14.99	27.91	5.93e-14	2.54e-12	1.78e-11
GO:0004298	threonine-type endopeptidase activity	13	9	69.2	23.72	78.62	8.19e-12	2.73e-10	2.46e-9
GO:0070003	threonine-type peptidase activity	13	9	69.2	23.72	78.62	8.19e-12	2.73e-10	2.46e-9
GO:0005488	binding	2327	111	4.8	1.63	2.67	5.79e-11	1.74e-9	1.74e-8
GO:0016903	oxidoreductase activity, acting on the aldehyde or oxo group of donors	19	9	47.4	16.23	31.42	9.09e-10	2.48e-8	2.73e-7
GO:0003824	catalytic activity	1963	94	4.8	1.64	2.37	9.17e-9	2.29e-7	2.75e-6
GO:0003676	nucleic acid binding	686	45	6.6	2.25	2.76	9.06e-8	2.09e-6	2.72e-5
GO:0036094	small molecule binding	763	48	6.3	2.16	2.67	1.10e-7	2.35e-6	3.29e-5
GO:0043168	anion binding	747	46	6.2	2.11	2.57	4.15e-7	8.29e-6	1.24e-4
GO:0000166	nucleotide binding	739	45	6.1	2.09	2.53	7.95e-7	1.37e-5	2.38e-4
GO:1901265	nucleoside phosphate binding	739	45	6.1	2.09	2.53	7.95e-7	1.37e-5	2.38e-4
GO:0016620	oxidoreductase activity, acting on the aldehyde or oxo group of donors, NAD or NADP as acceptor	13	6	46.2	15.81	29.43	8.25e-7	1.37e-5	2.47e-4
GO:0016491	oxidoreductase activity	239	22	9.2	3.15	3.69	1.40e-6	2.21e-5	4.20e-4
GO:0050662	coenzyme binding	84	12	14.3	4.89	5.86	4.81e-6	7.22e-5	1.44e-3
GO:0035639	purine ribonucleoside triphosphate binding	657	38	5.8	1.98	2.31	2.35e-5	3.36e-4	7.06e-3
GO:0032555	purine ribonucleotide binding	666	38	5.7	1.96	2.27	3.20e-5	4.36e-4	9.60e-3
